# Supplementary material for: Printing via Laser-Induced Forward Transfer and the Future of Digital Manufacturing
Source: MDPI journal article supplement (doi:10.3390/ma16020698), 2023-01-11
Supplement: s1 [file s1]

# Printing via Laser-Induced Forward Transfer and the Future of Digital Manufacturing

Camilo Florian <sup>1,2,\*</sup> and Pere Serra <sup>3</sup>

<sup>1</sup> Princeton Institute for the Research and Technology of Materials (PRISM), Princeton University, 70 Prospect Av, Princeton, NJ 08540, USA

<sup>2</sup> Instituto de Óptica Daza de Valdés, Consejo Superior de Investigaciones Científicas (IO-CSIC), Calle Serrano 122, 28006 Madrid, Spain

<sup>3</sup> Departament de Física Aplicada, Universitat de Barcelona, Martí i Franqués 1, 08028 Barcelona, Spain

\* Correspondence: camilo.florian@csic.es

## Supplementary Material

1. Results of patent and patent application lists sorted using the keywords “laser induced forward transfer” into two public patent office data bases: the European Patent Office (EPO) and the United States Patent and Trademark Office (USPTO). On this premise, we select patents publications that are publicly accessible and published with a patent publication number, regardless of the acceptance or licensing status. In the following data we therefore jointly present patents with patent applications. We find 321 patents reported on the EPO and 303 on USPTO, that, regardless of the publication country, are reported in these databases.

### *Patent list from EPO*

| #  | Publication number | Title                                                                                                 | Earliest publication |
|----|--------------------|-------------------------------------------------------------------------------------------------------|----------------------|
| 1  | US2022348859A1     | LITHOGRAPHIC MASKING FOR SPATIALLY LOCALIZED BIOCHEMICAL STIMULUS DELIVERY                            | 2022-11-03           |
| 2  | CN115181962A       | A LASER-INDUCED HIGH-VISCOSITY PASTE MULTIPLE IMPRINTING METHOD                                       | 2022-10-14           |
| 3  | JP2022151818A      | DISPLAY DEVICE MANUFACTURING METHOD                                                                   | 2022-10-07           |
| 4  | WO2022202945A1     | METHOD FOR MANUFACTURING DISPLAY DEVICE                                                               | 2022-09-29           |
| 5  | CN115094374A       | MATERIALS AND METHODS FOR MAKING PATTERNED METAL OXIDE THIN FILMS                                     | 2022-09-23           |
| 6  | US2022296424A1     | SYSTEM AND METHOD FOR PERSONALIZED IMPLANTABLE SCAFFOLDS FOR WOUND HEALING                            | 2022-09-22           |
| 7  | CN115041836A       | A LASER-INDUCED TRANSFER METHOD FOR MAGNETIC DRIVE UNIT OF A MAGNETIC DRIVE ORIGAMI SOFT ROBOT        | 2022-09-13           |
| 8  | US2022281253A1     | ADDITIVE OPTO-THERMOMECHANICAL NANOPRINTING AND NANOREPAIRING UNDER AMBIENT CONDITIONS                | 2022-09-08           |
| 9  | CN114944442A       | A LASER PROJECTION PROXIMITY TYPE MICROLED MASS TRANSFER TRANSPOSITION, METHOD AND SYSTEM             | 2022-08-26           |
| 10 | US2022266382A1     | LASER-SEEDING FOR ELECTRO-CONDUCTIVE PLATING                                                          | 2022-08-25           |
| 11 | US2022260063A1     | ELECTROSPRAY EMISSION APPARATUS                                                                       | 2022-08-18           |
| 12 | WO2022167516A1     | A METHOD TO PREPARE POCKETS OF ENCAPSULATED MATERIAL COMPRISING A CORE SURROUNDED BY AN ENCAPSULATION | 2022-08-11           |
| 13 | CN114864474A       | A LASER PROJECTION PROXIMITY MASS TRANSFER DEVICE, METHOD AND EQUIPMENT                               | 2022-08-05           |
| 14 | US2022248540A1     | HIGH-RESOLUTION SOLDERING                                                                             | 2022-08-04           |
| 15 | JP7111916B1        | RETRANSFER METHOD AND LIFT METHOD                                                                     | 2022-08-02           |
| 16 | CN114799225A       | PULSE LASER DRIVING METAL MICRODROPLET PRINTING SYSTEM AND ADJUSTING METHOD                           | 2022-07-29           |

|    |                                 |                                                                                                                                                                                              |            |
|----|---------------------------------|----------------------------------------------------------------------------------------------------------------------------------------------------------------------------------------------|------------|
| 17 | US2022227116A1                  | FOUNTAIN SOLUTION IMAGING USING DRY TONER ELECTROPHOTOGRAPHY                                                                                                                                 | 2022-07-21 |
| 18 | US11393773B1                    | STRESS ISOLATING INTERPOSER AND SENSOR PACKAGE AND METHOD OF MANUFACTURING THE SAME                                                                                                          | 2022-07-19 |
| 19 | WO2022144608A1                  | LIFT PRINTING OF FINE METAL LINES                                                                                                                                                            | 2022-07-07 |
| 20 | WO2022147143A1                  | CONFIGURABLE LEADED PACKAGE                                                                                                                                                                  | 2022-07-07 |
| 21 | US2022208701A1                  | PRINTED PACKAGE AND METHOD OF MAKING THE SAME                                                                                                                                                | 2022-06-30 |
| 22 | US2022194111A1                  | METHOD AND A DEVICE FOR ASSEMBLY OF A NANOMATERIAL STRUCTURE                                                                                                                                 | 2022-06-21 |
| 23 | KR20220081748A                  | OPTICAL ELEMENT ARRAY STRUCTURE FOR BIRD COLLISION PREVENTION AND MANUFACTURING METHOD THEREOF                                                                                               | 2022-06-09 |
| 24 | JP2022086606A                   | FLYING OBJECT GENERATION DEVICE, IMAGE FORMATION DEVICE, SOLID MOLDING MANUFACTURING APPARATUS, FLYING OBJECT GENERATION METHOD, AND SUBSTRATE FOR LIGHT ABSORPTION MATERIAL FLYING          | 2022-06-09 |
| 25 | JP2022086831A                   | FLYING OBJECT GENERATION METHOD, FLYING OBJECT GENERATION DEVICE, IMAGE FORMATION APPARATUS AND MANUFACTURING DEVICE OF THREE-Dimensionally MOLDED ARTICLE                                   | 2022-06-02 |
| 26 | WO2022106914A1                  | REPAIR OF SOLDER BUMPS                                                                                                                                                                       | 2022-05-27 |
| 27 | WO2022104099A1                  | TRANSDUCERS, THEIR METHODS OF MANUFACTURE AND USES                                                                                                                                           | 2022-05-19 |
| 28 | WO2022063393A1                  | METHOD AND 3D PRINTING METHOD FOR LAYER-BY-LAYER FABRICATION OF OBJECTS USING LAYER TRANSFER PRINTING                                                                                        | 2022-03-31 |
| 29 | US2022090022A1                  | GENERATING INDUCED PLURIPOTENT STEM CELLS                                                                                                                                                    | 2022-03-24 |
| 30 | CN114178547A                    | LASER-INDUCED TRANSFER MICRO ELECTRONIC COMPONENT PRINTING METHOD BASED ON NON-NEWTONIAN FLUID CHARACTERISTICS                                                                               | 2022-03-15 |
| 31 | US2022040377A1                  | LASER ABLATION/REMOVAL AND LASER INDUCED FORWARD TRANSFER OF BIOLOGICAL MATERIAL                                                                                                             | 2022-02-10 |
| 32 | JP2022026065A                   | FLYING OBJECT GENERATION DEVICE, IMAGE FORMATION DEVICE, MANUFACTURING METHOD OF THREE-DIMENSIONAL SHAPED ARTICLE, AND FLYING OBJECT GENERATION METHOD                                       | 2022-02-10 |
| 33 | WO2022003431A1                  | LASER PRINTING OF SOLDER PASTES                                                                                                                                                              | 2022-01-06 |
| 34 | EP3933902A1                     | A METHOD FOR POSITIONING COMPONENTS ON A SUBSTRATE                                                                                                                                           | 2022-01-05 |
| 35 | EP3928993A1                     | DEVICE FOR APPLYING ENERGY TO A SUBSTRATE                                                                                                                                                    | 2021-12-28 |
| 36 | CN215151845U                    | SOLUTION BATH NEAR-FIELD CELL 3D PRINTING FORMING DEVICE                                                                                                                                     | 2021-12-14 |
| 37 | JP2021187143A                   | LIGHT IRRADIATION METHOD, APPARATUS FOR ATTACHING LIGHT ABSORBING MATERIAL, FLYING BODY GENERATING METHOD AND APPARATUS, IMAGE FORMING METHOD, AND THREE-DIMENSIONAL OBJECT PRODUCING METHOD | 2021-12-13 |
| 38 | WO2021245467A1                  | HIGH-RESOLUTION SOLDERING                                                                                                                                                                    | 2021-12-09 |
| 39 | US2021379581A1                  | MAGNETIC PCR ASSAY AND USES THEREOF                                                                                                                                                          | 2021-12-09 |
| 40 | CN113733547A                    | LIGHT IRRADIATION METHOD, LIGHT ABSORBING MATERIAL ATTACHMENT DEVICE, AND RELATED METHODS AND DEVICES                                                                                        | 2021-12-02 |
| 41 | WO2021239765A1                  | TOPOGRAPHY-BASED DEPOSITION HEIGHT ADJUSTMENT                                                                                                                                                | 2021-12-01 |
| 42 | CN113547736A                    | MULTI-MATERIAL LASER-INDUCED TRANSFER 3D PRINTING METHOD AND DEVICE                                                                                                                          | 2021-10-26 |
| 43 | KR102373098B1<br>KR20210127522A | LIGHT EMITTING DEVICE                                                                                                                                                                        | 2021-10-22 |
| 44 | KR102360514B1<br>KR20210127523A | LIGHT EMITTING DEVICE                                                                                                                                                                        | 2021-10-22 |
| 45 | JP2021151772A                   | FLYING BODY GENERATION METHOD, FLYING BODY GENERATION APPARATUS AND IMAGE FORMATION METHOD                                                                                                   | 2021-09-30 |
| 46 | JP2021151666A                   | SCAN TYPE OPTICAL REDUCTION SYSTEM AND LASER PROCESSING DEVICE USING THE SAME                                                                                                                | 2021-09-30 |
| 47 | WO2021191897A1                  | COLLAGEN-BASED FORMULATIONS USABLE AS SOFT TISSUE FILLERS AND/OR IMPLANTS                                                                                                                    | 2021-09-30 |
| 48 | KR102373099B1<br>KR20210112880A | LIGHT EMITTING DEVICE AND METHOD OF MANUFACTURING THE SAME                                                                                                                                   | 2021-09-15 |
| 49 | KR102357759B1<br>KR20210112882A | LIGHT EMITTING DEVICE AND METHOD OF MANUFACTURING THE SAME                                                                                                                                   | 2021-09-15 |
| 50 | KR20210112878A                  | LIGHT EMITTING DEVICE AND METHOD OF MANUFACTURING THE SAME                                                                                                                                   | 2021-09-15 |
| 51 | GB2591498A<br>GB2591498B        | A METHOD OF CONNECTING CIRCUIT ELEMENTS.                                                                                                                                                     | 2021-08-04 |
| 52 | KR102378115B1<br>KR20210089555A | METHOD OF TRANSFERRING LIGHT EMITTING DEVICE CHIP                                                                                                                                            | 2021-07-16 |
| 53 | KR102325792B1<br>KR20210089557A | LIGHT EMITTING DEVICE AND METHOD OF MANUFACTURING THE SAME                                                                                                                                   | 2021-07-16 |

|    |                                 |                                                                                                                                                            |            |
|----|---------------------------------|------------------------------------------------------------------------------------------------------------------------------------------------------------|------------|
| 54 | KR102315912B1<br>KR20210089558A | METHOD OF MANUFACTURING LIGHT EMITTING DEVICE                                                                                                              | 2021-07-16 |
| 55 | KR102315911B1<br>KR20210089556A | LIGHT EMITTING DEVICE AND METHOD OF MANUFACTURING THE SAME                                                                                                 | 2021-07-16 |
| 56 | CN113085185A                    | FEMTOSECOND LASER-INDUCED LIQUID FILM FORWARD TRANSFER METHOD BASED ON TEMPORAL SHAPING                                                                    | 2021-07-09 |
| 57 | US2021205813A1                  | CONTACTLESS LIQUID LOADING TO MICROFLUIDIC DEVICES                                                                                                         | 2021-07-08 |
| 58 | KR102437637B1<br>KR20210084120A | METHOD OF MANUFACTURING LIGHT EMITTING DEVICE                                                                                                              | 2021-07-07 |
| 59 | KR102403425B1<br>KR20210084124A | METHOD OF MANUFACTURING MICRO LED DISPLAY                                                                                                                  | 2021-07-07 |
| 60 | KR102301877B1<br>KR20210084119A | LIGHT EMITTING DEVICE                                                                                                                                      | 2021-07-07 |
| 61 | KR20210084122A                  | METHOD OF MANUFACTURING LIGHT EMITTING DEVICE                                                                                                              | 2021-07-07 |
| 62 | CN113021874A                    | SINGLE CELL PRINTING METHOD BASED ON ANNULAR LASER SPOT INDUCED TRANSFER                                                                                   | 2021-06-25 |
| 63 | KR102397517B1<br>KR20210070834A | LIGHT EMITTING DEVICE                                                                                                                                      | 2021-06-15 |
| 64 | KR102325791B1<br>KR20210070835A | LIGHT EMITTING DEVICE                                                                                                                                      | 2021-06-15 |
| 65 | KR102301879B1<br>KR20210070833A | METHOD OF MANUFACTURING A LIGHT EMITTING DEVICE                                                                                                            | 2021-06-15 |
| 66 | CN114762133A                    | METHOD FOR MANUFACTURING SEMICONDUCTOR LIGHT-EMITTING ELEMENT                                                                                              | 2021-06-10 |
| 67 | WO2022160506A1                  | DROPLET THREE-DIMENSIONAL PRINTING SYSTEM AND METHOD DRIVEN BY PULSED LASER                                                                                | 2021-06-08 |
| 68 | US2021168943A1                  | METHOD FOR MANUFACTURING A CONDUCTOR STRUCTURAL ELEMENT AND CONDUCTOR STRUCTURAL ELEMENT                                                                   | 2021-06-03 |
| 69 | US2021157238A1                  | METHODS AND SYSTEMS FOR PRODUCING THREE-DIMENSIONAL ELECTRONIC PRODUCTS                                                                                    | 2021-05-27 |
| 70 | US2021155023A1                  | ARCHITECTED STAMPS FOR LIQUID TRANSFER PRINTING                                                                                                            | 2021-05-27 |
| 71 | US2021139321A1                  | LASER-ASSISTED MATERIAL PHASE-CHANGE AND EXPULSION MICRO-MACHINING PROCESS                                                                                 | 2021-05-13 |
| 72 | CN112768572A<br>CN112768572B    | MINIATURE LED MASS TRANSFER METHOD AND DEVICE BASED ON HIGH-SPEED SCANNING LASER TRANSFER PRINTING                                                         | 2021-05-07 |
| 73 | WO2021090089A1                  | SYSTEMS FOR MATERIAL DEPOSITION                                                                                                                            | 2021-05-06 |
| 74 | US2022293577A1                  | DISPLAY DEVICE AND DISPLAY UNIT                                                                                                                            | 2021-04-08 |
| 75 | JP2021053860A                   | THREE-DIMENSIONAL MODELING APPARATUS, CARRIER, AND THREE-DIMENSIONAL MODELING METHOD                                                                       | 2021-04-08 |
| 76 | CN212793450U                    | SOLDER PASTE LASER-INDUCED FORWARD TRANSFER EQUIPMENT                                                                                                      | 2021-03-26 |
| 77 | US2021090945A1                  | SYSTEM AND METHOD FOR INTERCONNECTION                                                                                                                      | 2021-03-25 |
| 78 | CN112477110A                    | SOLUTION BATH NEAR-FIELD CELL 3D PRINTING FORMING DEVICE AND FORMING METHOD THEREOF                                                                        | 2021-03-12 |
| 79 | CN114270508A                    | METHOD AND SYSTEM FOR STRETCHING RECEPTOR SUBSTRATE TO ADJUST ARRANGEMENT OF COMPONENTS                                                                    | 2021-02-25 |
| 80 | US11214015B2<br>US2021053297A1  | METHODS AND SYSTEMS FOR CONTROLLING TEMPERATURE ACROSS A REGION DEFINED BY USING THERMALLY CONDUCTIVE ELEMENTS                                             | 2021-02-25 |
| 81 | CN112382676A<br>CN112382676B    | SOLAR CELL GRID LINE LASER-INDUCED PRINTING METHOD BASED ON SILICON WAFER DOUBLE-GROOVE STRUCTURE                                                          | 2021-02-19 |
| 82 | US2021032739A1                  | DYNAMIC RELEASE MIRROR STRUCTURE FOR LASER-INDUCED FORWARD TRANSFER                                                                                        | 2021-02-04 |
| 83 | EP3771547A1                     | METHOD FOR 3D PRINTING OF VASCULARIZED TISSUES AND ORGANS                                                                                                  | 2021-02-03 |
| 84 | CN112140530A<br>CN112140530B    | MULTI-MODULE SERIAL BIOLOGICAL 3D PRINTING DEVICE                                                                                                          | 2020-12-29 |
| 85 | WO2020254782A1                  | METHOD OF MANUFACTURING A MICROFLUIDIC ARRANGEMENT, METHOD OF OPERATING A MICROFLUIDIC ARRANGEMENT, APPARATUS FOR MANUFACTURING A MICROFLUIDIC ARRANGEMENT | 2020-12-24 |
| 86 | WO2021005326A1                  | CONTACT LENSES WITH MICROCHANNELS                                                                                                                          | 2020-12-10 |
| 87 | WO2020225810A1                  | LIFT PRINTING USING THIN DONOR FOILS                                                                                                                       | 2020-11-12 |
| 88 | WO2020225777A1                  | SYSTEM AND METHOD FOR ORGANOID CULTURE                                                                                                                     | 2020-11-12 |
| 89 | CN111910154A<br>CN111910154B    | DYNAMIC FREQUENCY SELECTIVE SURFACE STRUCTURE AND PREPARATION METHOD THEREOF                                                                               | 2020-11-10 |
| 90 | WO2020222090A1                  | METHOD TO ELECTRICALLY CONNECT CHIP WITH TOP CONNECTORS USING 3D PRINTING                                                                                  | 2020-11-05 |
| 91 | WO2020212802A1                  | ANTERIOR LAMELLAR KERATOPLASTY                                                                                                                             | 2020-10-22 |
| 92 | WO2020212199A1                  | DEVICES AND METHODS FOR LASER SURGERY OF AN EYE, ESPECIALLY FOR KERATOPLASTY                                                                               | 2020-10-22 |
| 93 | US10808794B1                    | TOPOLOGICAL DAMPING MATERIALS AND METHODS THEREOF                                                                                                          | 2020-10-20 |

|     |                                  |                                                                                                                 |            |
|-----|----------------------------------|-----------------------------------------------------------------------------------------------------------------|------------|
| 94  | KR20210143883A                   | ADDITIVE MANUFACTURING ELECTRONIC (AME) CIRCUITS WITH SIDE-MOUNTED COMPONENTS                                   | 2020-10-08 |
| 95  | WO2020206044A1                   | FLEXIBLE TRANSPARENT MEMBRANE LIGHT EMITTING DIODE ARRAY AND SYSTEMS CONTAINING THE SAME                        | 2020-10-08 |
| 96  | CN113950872A                     | METHOD FOR TRANSFERRING A MATERIAL                                                                              | 2020-10-01 |
| 97  | JP2020160445A                    | DISPLAY DEVICE AND MANUFACTURING METHOD FOR THE SAME                                                            | 2020-09-30 |
| 98  | FR3093944A1<br>FR3093944B1       | CARTOUCHE POUR BIOIMPRESSION                                                                                    | 2020-09-25 |
| 99  | CN114390909A                     | MANUFACTURING TECHNOLOGY OF SKIN COMPATIBLE ELECTRODE                                                           | 2020-09-09 |
| 100 | US11185396B2<br>US2020261191A1   | 3D FABRICATION FOR DENTAL APPLICATIONS BASED ON ABLATION                                                        | 2020-08-20 |
| 101 | WO2020156632A1<br>WO2020156632A8 | METHOD FOR APPLYING AT LEAST ONE SILICON LAYER BY MEANS OF LASER TRANSFER PRINTING                              | 2020-08-06 |
| 102 | WO2020152352A1                   | LASER INDUCED FORWARD TRANSFER WITH HIGH THROUGHPUT AND RECYCLING OF DONOR MATERIAL ON A TRANSPARENT DRUM       | 2020-07-30 |
| 103 | CN113227391A                     | LASER-INDUCED CELL TRANSFER AND SORTING                                                                         | 2020-06-24 |
| 104 | WO2020127391A1                   | METHOD AND DEVICE FOR PRODUCING SACCHARIDES AND SACCHARIDE ARRAYS                                               | 2020-06-24 |
| 105 | CN210826328U                     | CLAMPING DEVICE FOR LASER-INDUCED FORWARD TRANSFER TECHNOLOGY                                                   | 2020-06-23 |
| 106 | CN111326548A                     | DISPLAY DEVICE                                                                                                  | 2020-06-18 |
| 107 | WO2020123851A2<br>WO2020123851A3 | LIGHT EMITTING DIODE (LED) MASS-TRANSFER APPARATUS AND METHOD OF MANUFACTURE                                    | 2020-06-18 |
| 108 | EP3663090A1                      | HIGH RESOLUTION LASER INDUCED FORWARD TRANSFER                                                                  | 2020-06-10 |
| 109 | CN111235545A                     | NANO-ALLOY PARTICLES AND PATTERNING METHOD THEREOF                                                              | 2020-06-05 |
| 110 | WO2020108821A1                   | METHOD FOR LAYER-WISE ADDITIVE MANUFACTURING OF A SHAPED BODY                                                   | 2020-06-03 |
| 111 | EP3660087A1                      | METHOD AND MATERIAL FOR THE PRODUCTION OF THREE-DIMENSIONAL OBJECTS BY ENERGY IMPULSE-INDUCED TRANSFER PRINTING | 2020-06-03 |
| 112 | EP3660085A1                      | SUPPORT MATERIAL FOR ENERGY IMPULSE-INDUCED TRANSFER PRINTING                                                   | 2020-06-03 |
| 113 | EP3659989A1                      | SLURRY AND METHOD FOR MANUFACTURING OF CERAMIC AND GLASS-CERAMIC 3D STRUCTURES                                  | 2020-06-03 |
| 114 | CN113169238A                     | PHOTOVOLTAIC DEVICE AND METHOD OF MANUFACTURING THE SAME                                                        | 2020-05-20 |
| 115 | WO2020097083A1                   | SYSTEMS FOR CELL CONTROL                                                                                        | 2020-05-14 |
| 116 | EP3650240A1                      | MULTIPLE COLOR IMAGE                                                                                            | 2020-05-13 |
| 117 | US2021394444A1                   | ENCLOSED BIOPRINTING DEVICE                                                                                     | 2020-04-30 |
| 118 | US2021358792A1                   | METHOD FOR PRODUCING OPTOELECTRONIC DEVICES                                                                     | 2020-04-30 |
| 119 | CN112930263A                     | ROBOTIC BIOPRINTING SYSTEM                                                                                      | 2020-04-30 |
| 120 | US2021348288A1                   | MENISCUS-CONFINED THREE-DIMENSIONAL ELECTRODEPOSITION                                                           | 2020-04-16 |
| 121 | US11213608B2<br>US2020108172A1   | COMPOSITIONS INCLUDING GELATIN NANOPARTICLES AND METHODS OF USE THEREOF                                         | 2020-04-09 |
| 122 | CN112739953A                     | A SEGMENTED LIGHT GUIDE AND A METHOD OF MANUFACTURING THEREOF                                                   | 2020-03-25 |
| 123 | US10600739B1                     | INTERPOSER WITH INTERCONNECTS AND METHODS OF MANUFACTURING THE SAME                                             | 2020-03-24 |
| 124 | EP3624571A1                      | A PROCESS FOR THE MANUFACTURING OF PRINTED CONDUCTIVE TRACKS ON AN OBJECT AND 3D PRINTED ELECTRONICS            | 2020-03-18 |
| 125 | KR102146240B1<br>KR20200016099A  | METHOD OF FORMING PATTERNS FOR A STRETCHABLE DEVICE                                                             | 2020-02-14 |
| 126 | CN110756986A                     | METHOD AND DEVICE FOR PREPARING MICRO LENS ARRAY THROUGH LASER-INDUCED FORWARD TRANSFER                         | 2020-02-07 |
| 127 | WO2020026241A1                   | TOBACCO TRANSGENIC EVENT AND METHODS FOR DETECTION AND USE THEREOF                                              | 2020-02-06 |
| 128 | US2020023584A1                   | FABRICATION AND DESIGN OF COMPOSITES WITH ARCHITECTED LAYERS                                                    | 2020-01-23 |
| 129 | CN110690300A<br>CN110690300B     | LASER-INDUCED TRANSFER PRINTING METHOD FOR ELECTRODE GRID LINE OF PHOTOVOLTAIC SOLAR CELL                       | 2020-01-14 |
| 130 | CN110666169A<br>CN110666169B     | MULTI-MATERIAL LASER-INDUCED FORWARD TRANSFER 3D PRINTING DEVICE AND METHOD                                     | 2020-01-10 |
| 131 | FR3081753A1<br>FR3081753B1       | SYSTEME DE DEPOT MATIERE ET PROCEDE ASSOCIE                                                                     | 2019-12-05 |
| 132 | WO2019226195A2<br>WO2019226195A3 | FABRICATION AND DESIGN OF COMPOSITES WITH ARCHITECTED LAYERS                                                    | 2019-11-28 |
| 133 | CN110484425A                     | SINGLE-CELL COLLECTION DEVICE                                                                                   | 2019-11-22 |

|     |                                      |                                                                                                                                    |            |
|-----|--------------------------------------|------------------------------------------------------------------------------------------------------------------------------------|------------|
| 134 | CN209502972U                         | PROCESSING DEVICE FOR MANUFACTURING SILVER PASTE ELECTRODE THROUGH LASER-INDUCED FORWARD TRANSFER PRINTING AND SINTERING           | 2019-10-18 |
| 135 | WO2019198086A1                       | BIOENGINEERED CORNEAL GRAFT AND METHODS OF PREPARATION THEREOF                                                                     | 2019-10-17 |
| 136 | US11453171B2<br>US2021362431A1       | METHOD OF APPARATUS FOR FORMING AN OBJECT BY MEANS OF ADDITIVE MANUFACTURING                                                       | 2019-10-16 |
| 137 | CN111954935A                         | LASER ASSISTED METALLIZATION PROCESS FOR SOLAR CELL FABRICATION                                                                    | 2019-10-10 |
| 138 | WO2019195793A1                       | LASER ASSISTED METALLIZATION PROCESS FOR SOLAR CELL STRINGING                                                                      | 2019-10-10 |
| 139 | WO2019195803A1                       | LASER ASSISTED METALLIZATION PROCESS FOR SOLAR CELL FABRICATION                                                                    | 2019-10-10 |
| 140 | EP3543371A1<br>EP3543371B1           | CONTINUOUS LASER INDUCED FORWARD TRANSFER OF MATERIAL SYSTEM                                                                       | 2019-09-25 |
| 141 | US10982109B2<br>US2021047532A1       | TWO-COMPONENT PRINTABLE CONDUCTIVE COMPOSITION                                                                                     | 2019-09-19 |
| 142 | US2020376486A1                       | METHODS AND APPARATUS FOR MANUFACTURING A MICROFLUIDIC ARRANGEMENT, AND A MICROFLUIDIC ARRANGEMENT                                 | 2019-08-28 |
| 143 | CN209281091U                         | SOLDER PASTE LASER-INDUCED FORWARD TRANSFER EQUIPMENT                                                                              | 2019-08-20 |
| 144 | WO2019154980A1                       | METHOD FOR LASER-INDUCED FORWARD TRANSFER USING EFFECT PIGMENTS                                                                    | 2019-08-15 |
| 145 | WO2019154826A1                       | METHOD FOR LASER-INDUCED FORWARD TRANSFER USING METAL OXIDE ABSORBER PARTICLES                                                     | 2019-08-15 |
| 146 | CN111684099A                         | LIFT DEPOSITION APPARATUS AND METHOD                                                                                               | 2019-08-07 |
| 147 | WO2019151854A1                       | METHOD AND APPARATUS FOR CREATING AND SINTERING FINE LINES AND PATTERNS                                                            | 2019-08-07 |
| 148 | CN111684550A                         | DIRECT PRINTING OF EMBEDDED RESISTORS                                                                                              | 2019-07-18 |
| 149 | WO2019129349A1                       | DUAL BEAM LASER TRANSFER                                                                                                           | 2019-07-04 |
| 150 | DE102017130947A1<br>DE102017130947B4 | VERFAHREN ZUR HERSTELLUNG EINES MIKROSYSTEMBAUTEILS                                                                                | 2019-06-27 |
| 151 | CN109926583A                         | PROCESSING DEVICE AND METHOD FOR PREPARING SILVER PASTE ELECTRODE BY LASER-INDUCED FORWARD TRANSFERRING PRINTING AND SINTERING     | 2019-06-25 |
| 152 | CN109911848A<br>CN109911848B         | DEVICE AND METHOD CAPABLE OF PRECISELY CONTROLLING AND TRANSMITTING NANOWIRE                                                       | 2019-06-21 |
| 153 | US11027145B2<br>US2019184189A1       | LASER INDUCED BALLISTIC PARTICLE IMPLANTATION TECHNIQUE                                                                            | 2019-06-20 |
| 154 | CN109877341A<br>CN109877341B         | SMELTING METHOD AND PATTERNING METHOD OF NANO METAL PARTICLES                                                                      | 2019-06-14 |
| 155 | EP3710275A1<br>EP3710275B1           | METAL DROPLET JETTING SYSTEM                                                                                                       | 2019-05-16 |
| 156 | US11388824B2<br>US2019110367A1       | COMPONENT CARRIER HAVING A THREE DIMENSIONALLY PRINTED WIRING STRUCTURE                                                            | 2019-04-10 |
| 157 | US10254499B1                         | ADDITIVE MANUFACTURING OF ACTIVE DEVICES USING DIELECTRIC, CONDUCTIVE AND MAGNETIC MATERIALS                                       | 2019-04-09 |
| 158 | CN109581674A<br>CN109581674B         | SOLDER PASTE LASER-INDUCED FORWARD TRANSFER DEVICE AND METHOD                                                                      | 2019-04-05 |
| 159 | RO133156A2                           | METHOD FOR PRINTING PIXELS WITH PIEZOELECTRIC ACTIVITY OF ECOLOGICAL MATERIALS BASED ON DOPED BARIUM TITANATE                      | 2019-03-29 |
| 160 | US2020166438A1                       | TISSUE MARKING SYSTEM                                                                                                              | 2019-02-21 |
| 161 | US11155774B2<br>US2018371389A1       | METHOD AND APPARATUS FOR GENERATING THREE-DIMENSIONAL PATTERNED SOFT STRUCTURES AND USES THEREOF                                   | 2018-12-27 |
| 162 | US2018370116A1                       | THREE-DIMENSIONAL PRINTING OF REACTIVE MATERIALS USING INTERSECTING JETS                                                           | 2018-12-27 |
| 163 | WO2018225076A1<br>WO2018225076A8     | ADDITIVE MANUFACTURING USING RECOMBINANT COLLAGEN-CONTAINING FORMULATION                                                           | 2018-12-13 |
| 164 | WO2018225073A1                       | 3D PRINTING OF MEDICINAL UNIT DOSES                                                                                                | 2018-12-13 |
| 165 | US2021028141A1                       | ELECTRICAL INTERCONNECTION OF CIRCUIT ELEMENTS ON A SUBSTRATE WITHOUT PRIOR PATTERNING                                             | 2018-11-29 |
| 166 | US10940687B2<br>US2020070514A1       | SYSTEM AND METHOD FOR LASER INDUCED FORWARD TRANSFER COMPRISING A MICROFLUIDIC CHIP PRINT HEAD WITH A RENEWABLE INTERMEDIATE LAYER | 2018-10-25 |
| 167 | KR20200008558A                       | ENERGY CONTROL COATINGS, STRUCTURES, DEVICES AND METHODS OF MAKING SAME                                                            | 2018-10-25 |
| 168 | WO2018193454A1                       | MICROFLUIDIC HEAD FOR LASER INDUCED FORWARD TRANSFER                                                                               | 2018-10-25 |
| 169 | EP3596197A1<br>EP3596197B1           | BIOPRINTING PROCESS                                                                                                                | 2018-09-20 |

|     |                                 |                                                                                                         |            |
|-----|---------------------------------|---------------------------------------------------------------------------------------------------------|------------|
| 170 | CN110402125A<br>CN110402125B    | EQUIPMENT AND METHOD FOR ADDITIVE MANUFACTURING                                                         | 2018-09-20 |
| 171 | WO2018167399A1                  | DEVICE AND METHOD FOR THE DEPOSITION OF PARTICLES ON A TARGET                                           | 2018-09-20 |
| 172 | US10916465B1                    | INORGANIC LIGHT EMITTING DIODE (ILED) ASSEMBLY VIA DIRECT BONDING                                       | 2018-09-13 |
| 173 | WO2018140145A1                  | COMPOSITIONS AND METHODS RELATED TO 2 DIMENSIONAL MOLECULAR COMPOSITES                                  | 2018-08-02 |
| 174 | WO2018127850A1                  | THREE-DIMENSIONAL TUMOR MODELS, METHODS OF MANUFACTURING SAME AND USES THEREOF                          | 2018-07-12 |
| 175 | JP2020514094A<br>JP6851649B2    | METHODS FOR DEPOSITING FUNCTIONAL MATERIALS ON SUBSTRATES                                               | 2018-06-28 |
| 176 | US2018171468A1                  | METHOD FOR DEPOSTING A FUNCTIONAL MATERIAL ON A SUBSTRATE                                               | 2018-06-21 |
| 177 | US2019301006A1                  | COMPOSITION SUITABLE FOR APPLICATION WITH LASER INDUCED FORWARD TRANSFER (LIFT)                         | 2018-06-13 |
| 178 | WO2018100580A1                  | METHOD AND SYSTEM FOR 3D PRINTING                                                                       | 2018-06-07 |
| 179 | CN109952189A                    | HYBRID, MULTI-MATERIAL 3D PRINTING                                                                      | 2018-05-24 |
| 180 | CN108018549A                    | MULTIDIMENSIONAL MICRO STRUCTURE DEPOSITION METHOD BASED ON LASER INDUCED NOZZLE                        | 2018-05-11 |
| 181 | US2021354179A1                  | SINGLE PROCEDURE INDICATORS                                                                             | 2018-04-26 |
| 182 | WO2018069448A1                  | FORMING SOLID MATERIAL IN RECESS OF LAYER STRUCTURE BASED ON APPLIED FLUIDIC MEDIUM                     | 2018-04-19 |
| 183 | KR20180035127A                  | - METHOD AND APPARATUS FOR PRINTING HIGH-VISCOSITY MATERIALS                                            | 2018-03-29 |
| 184 | CN109716536A                    | METHOD FOR PRODUCING ELECTRICAL CONTACTS ON A COMPONENT                                                 | 2018-03-22 |
| 185 | US2020055327A1                  | MULTI-TECHNOLOGY PRINTING SYSTEM                                                                        | 2018-02-22 |
| 186 | JP2019532490A                   | IMPROVED PROCESSING OF POLYMER-BASED INKS AND PASTES                                                    | 2018-02-14 |
| 187 | EP4086080A1                     | LASER-INDUCED MATERIAL DISPENSING                                                                       | 2018-01-18 |
| 188 | CN107521239A                    | MASKLESS PAINTING AND PRINTING                                                                          | 2017-12-20 |
| 189 | CN107378231A<br>CN107378231B    | METHOD FOR PREPARING METAL STRUCTURE ON SURFACE OF TRANSPARENT MATERIAL BY USING METAL NANOMETER INK    | 2017-11-24 |
| 190 | US2017329201A1                  | TUNABLE ACOUSTIC GRADIENT INDEX OF REFRACTION LENS AND SYSTEM                                           | 2017-11-16 |
| 191 | US10957615B2<br>US2019019736A1  | LASER-SEEDING FOR ELECTRO-CONDUCTIVE PLATING                                                            | 2017-10-05 |
| 192 | CA3018405A1                     | METHOD FOR SOLVENT-FREE PRINTING CONDUCTORS ON SUBSTRATE                                                | 2017-09-28 |
| 193 | CN109153037A<br>CN109153037B    | METHOD FOR DEPOSITING FUNCTIONAL MATERIAL ON SUBSTRATE                                                  | 2017-09-21 |
| 194 | US11089690B2<br>US2017268100A1  | METHOD FOR DEPOSITING A FUNCTIONAL MATERIAL ON A SUBSTRATE                                              | 2017-09-21 |
| 195 | CN206404752U                    | DEVICE OF PREPARATION PARTICLE                                                                          | 2017-08-15 |
| 196 | GB2546761A<br>GB2546761B        | METHODS AND CIRCUITS                                                                                    | 2017-08-02 |
| 197 | WO2017103007A1                  | METHOD FOR ACTIVATING CLICK REACTIONS THROUGH LASER INDUCED FORWARD TRANSFER OF MOLECULES               | 2017-06-21 |
| 198 | CN106825915A<br>CN106825915B    | SYSTEM AND METHOD FOR PREPARING PATTERNED METAL THIN LAYER THROUGH PULSE LASER-INDUCED FORWARD TRANSFER | 2017-06-13 |
| 199 | CN106842588A<br>CN106842588B    | DEVICE AND METHOD FOR PREPARING STRUCTURAL COLOUR FILM BY LASER-INDUCED FORWARD TRANSFER                | 2017-06-13 |
| 200 | US10446260B2<br>US2017160535A1  | SPATIALLY INDEXED TISSUE BIOBANK WITH MICROSCOPIC PHENOTYPE-BASED RETRIEVAL SYSTEM                      | 2017-06-08 |
| 201 | US10688692B2<br>US2018281243A1  | CONTROL OF SURFACE PROPERTIES OF PRINTED THREE-DIMENSIONAL STRUCTURES                                   | 2017-05-26 |
| 202 | US10658283B2<br>US2018323139A1  | METHOD FOR MANUFACTURING A DEVICE WITH INTEGRATED-CIRCUIT CHIP BY DIRECT DEPOSIT OF CONDUCTIVE MATERIAL | 2017-05-10 |
| 203 | US2017103902A1<br>US9685349B2   | LASER-INDUCED FORMING AND TRANSFER OF SHAPED METALLIC INTERCONNECTS                                     | 2017-04-13 |
| 204 | WO2017044646A1                  | LASER PROCESSING APPARATUS, METHODS OF LASER-PROCESSING WORKPIECES AND RELATED ARRANGEMENTS             | 2017-03-16 |
| 205 | KR101787013B1<br>KR20170026718A | APPARATUS FOR FINE PATTERN FORMATION USING ROLL-TO-ROLL PRINTED ELECTRONICS PROCESS                     | 2017-03-09 |
| 206 | US2017028626A1                  | COMPACT DROP-ON-DEMAND APPARATUS USING LIGHT ACTUATION THROUGH OPTICAL FIBERS                           | 2017-02-02 |
| 207 | WO2017011029A1                  | STABLE UNDERCOOLED METALLIC PARTICLES FOR ENGINEERING AT AMBIENT CONDITIONS                             | 2017-01-19 |
| 208 | CN107849687A<br>CN107849687B    | CONTROL OF LASER-INDUCED FORWARD TRANSFER EJECTION ANGLE                                                | 2017-01-12 |

|     |                                  |                                                                                                                                                |            |
|-----|----------------------------------|------------------------------------------------------------------------------------------------------------------------------------------------|------------|
| 209 | KR101694625B1                    | 3D SCAFFOLD FOR TISSUE REGENERATION AND MANUFACTURING METHOD THEREOF                                                                           | 2017-01-09 |
| 210 | WO2017004615A1                   | ISOLATION OF MICRONICHES FROM SOLID-PHASE AND SOLID SUSPENSION IN LIQUID PHASE MICROBIOMES USING LASER INDUCED FORWARD TRANSFER                | 2017-01-05 |
| 211 | US2016367358A1<br>US9968437B2    | 3D PRINTER                                                                                                                                     | 2016-12-22 |
| 212 | US2016368211A1                   | 3D PRINTER                                                                                                                                     | 2016-12-22 |
| 213 | WO2016189527A1                   | A TWO, THREE AND FOUR DIMENSIONS BIO PRINTING SYSTEM                                                                                           | 2016-12-01 |
| 214 | EP3289838A1<br>EP3289838B1       | PRINTING METHOD USING TWO LASERS                                                                                                               | 2016-10-28 |
| 215 | WO2016124708A1                   | CONTINUOUS PROCESS FOR OPTIMIZED LASER INDUCED FORWARD TRANSFER TO CREATE ARBITRARY PATTERNS                                                   | 2016-08-11 |
| 216 | US10633758B2<br>US2017365484A1   | PRINTING OF THREE-DIMENSIONAL METAL STRUCTURES WITH A SACRIFICIAL SUPPORT                                                                      | 2016-07-28 |
| 217 | CN107206548A<br>CN107206548B     | ANGLED LASER-INDUCED FORWARD CONVERSION JETTING                                                                                                | 2016-07-28 |
| 218 | EP3233499A1<br>EP3233499B1       | LASER PRINTING METHOD, AND DEVICE FOR IMPLEMENTING SAID METHOD                                                                                 | 2016-06-23 |
| 219 | EP3234102A1<br>EP3234102B1       | METHOD FOR LASER PRINTING BIOLOGICAL COMPONENTS, AND DEVICE FOR IMPLEMENTING SAID METHOD                                                       | 2016-06-23 |
| 220 | US10363731B2<br>US2016176110A1   | EJECTOR DEVICE                                                                                                                                 | 2016-06-23 |
| 221 | EP3035404A1                      | BARRIER FOIL COMPRISING AN ELECTRICAL CIRCUIT                                                                                                  | 2016-06-22 |
| 222 | WO2016063270A1                   | LLIFT PRINTING OF CONDUCTIVE TRACES ONTO A SEMICONDUCTOR SUBSTRATE                                                                             | 2016-04-28 |
| 223 | EP3200974A1<br>EP3200974B1       | ALIGNING AN AGENT DISTRIBUTOR                                                                                                                  | 2016-04-07 |
| 224 | US9290671B1                      | LOW COST SEMICONDUCTING ALLOY NANOPARTICLES INK AND MANUFACTURING PROCESS THEREOF                                                              | 2016-03-22 |
| 225 | US2017210142A1<br>US9925797B2    | LIFT PRINTING SYSTEM                                                                                                                           | 2016-02-11 |
| 226 | EP3172488A1<br>EP3172488B1       | LIGHT SOURCE COOLING BODY, LIGHT SOURCE ASSEMBLY, A LUMINAIRE AND METHOD TO MANUFACTURE A LIGHT SOURCE COOLING BODY OR A LIGHT SOURCE ASSEMBLY | 2016-01-28 |
| 227 | CN105271106A                     | LASER IMPLANTATION PREPARATION METHOD FOR MULTI-DIMENSIONAL CONTINUOUS FINE STRUCTURE                                                          | 2016-01-27 |
| 228 | CN106687617A<br>CN106687617B     | LASER-TRANSFERRED IBC SOLAR CELLS                                                                                                              | 2016-01-21 |
| 229 | WO2015181810A1                   | PRINTING OF 3D STRUCTURES BY LASER-INDUCED FORWARD TRANSFER                                                                                    | 2015-12-03 |
| 230 | WO2015177497A1                   | ADDITIVE MANUFACTURE OF COMPOSITE MATERIALS                                                                                                    | 2015-11-26 |
| 231 | GB2526328A                       | ADDITIVE MANUFACTURE OF COMPOSITE MATERIALS                                                                                                    | 2015-11-25 |
| 232 | EP2946912A1                      | ADDITIVE MANUFACTURE OF COMPOSITE MATERIALS                                                                                                    | 2015-11-25 |
| 233 | US2015301428A1<br>US9594288B2    | TUNABLE ACOUSTIC GRADIENT INDEX OF REFRACTION LENS AND SYSTEM                                                                                  | 2015-10-22 |
| 234 | TW201537639A<br>TW1640041B       | METHODS FOR HIGH-RESOLUTION PATTERNING OF MULTIPLE LAYERS SIDE BY SIDE                                                                         | 2015-10-01 |
| 235 | US2017071062A1<br>US9750141B2    | PRINTING HIGH ASPECT RATIO PATTERNS                                                                                                            | 2015-09-24 |
| 236 | WO2015107051A1                   | LASER DIRECT SYNTHESIS AND DEPOSIT OF NANOCOMPOSITE MATERIALS OR NANOSTRUCTURES                                                                | 2015-07-22 |
| 237 | US10820418B2<br>US2016330841A1   | ELECTRONIC MODULE, METHOD FOR MANUFACTURING SAME AND ELECTRONIC DEVICE COMPRISING A MODULE OF SAID TYPE                                        | 2015-07-08 |
| 238 | JP2020061553A<br>JP7130614B2     | PRINTED CIRCUIT WIRING REPAIR                                                                                                                  | 2015-06-24 |
| 239 | EP2883709A1                      | METHOD AND SYSTEM FOR FORMING A PATTERNED STRUCTURE ON A SUBSTRATE                                                                             | 2015-06-17 |
| 240 | KR102292841B1<br>KR20160078383A  | METHOD AND SYSTEM FOR FORMING A PATTERNED STRUCTURE ON A SUBSTRATE                                                                             | 2015-05-07 |
| 241 | WO2015061800A2<br>WO2015061800A3 | TISSUE ENGINEERED DEVICES AND METHODS FOR MAKING SAME                                                                                          | 2015-04-30 |
| 242 | AU2015101219A4                   | METHOD FOR PREPARING CELL-LADEN 3D SCAFFOLDS AND APPLICATION                                                                                   | 2015-04-29 |
| 243 | TW201525166A<br>TW1623633B       | METHOD AND APPARATUS FOR MATERIAL DEPOSITION AND DONOR DEVICE                                                                                  | 2015-04-23 |
| 244 | WO2015054188A1                   | MULTIMODE IMAGE AND SPECTRAL READER                                                                                                            | 2015-04-16 |
| 245 | WO2015028407A1                   | METHOD FOR LITHOGRAPHIC PATTERNING OF ORGANIC LAYERS                                                                                           | 2015-03-05 |

|     |                                           |                                                                                                                                             |            |
|-----|-------------------------------------------|---------------------------------------------------------------------------------------------------------------------------------------------|------------|
| 246 | CA2919094A1                               | INTERFEROMETRIC LASER PROCESSING                                                                                                            | 2015-01-29 |
| 247 | US10822605B2<br>US2015072873A1            | METHOD AND APPARATUS FOR PRODUCING SEQUENCE VERIFIED DNA                                                                                    | 2014-11-06 |
| 248 | WO2014172630A1                            | LASER MARKING FOR AUTHENTICATION AND TRACKING                                                                                               | 2014-10-23 |
| 249 | CA2907039A1<br>CA2907039C                 | ELECTROACTIVE CULTURES AND APPARATUSES THEREFOR                                                                                             | 2014-09-25 |
| 250 | CN105143987A<br>CN105143987B              | MECHANICALLY PRODUCED ALIGNMENT FIDUCIAL METHOD AND ALIGNMENT SYSTEM                                                                        | 2014-09-18 |
| 251 | CN104995725A                              | METHOD FOR CREATING ELECTRICAL CONTACTS AND CONTACTS CREATED IN THIS WAY                                                                    | 2014-05-30 |
| 252 | KR20140051042A                            | MULTI-TECHNOLOGY PRINTING SYSTEM                                                                                                            | 2014-04-30 |
| 253 | US2017043603A1<br>US9751351B2             | MULTI-TECHNOLOGY PRINTING SYSTEM                                                                                                            | 2014-04-24 |
| 254 | ES2443240A2<br>ES2443240B1<br>ES2443240R1 | METHOD FOR THE SELECTIVE DOPING OF A SEMICONDUCTOR BY LASER INDUCED TRANSFER (MACHINE-TRANSLATION BY GOOGLE TRANSLATE, NOT LEGALLY BINDING) | 2014-02-18 |
| 255 | EP2685515A1                               | METHOD AND SYSTEM FOR DIVIDING A BARRIER FOIL                                                                                               | 2014-01-15 |
| 256 | EP2660352A1                               | DONOR SHEET AND METHOD FOR LIGHT INDUCED FORWARD TRANSFER MANUFACTURING                                                                     | 2013-11-06 |
| 257 | EP2844485A1<br>EP2844485B1                | DIE FOR DEPOSITING AT LEAST ONE CONDUCTIVE FLUID ONTO A SUBSTRATE, AND DEVICE INCLUDING SUCH A MATRIX AND DEPOSITION METHOD                 | 2013-11-01 |
| 258 | US2014155297A1                            | METHOD AND APPARATUS FOR LIGHT BASED RECOVERY OF SEQUENCE VERIFIED DNA                                                                      | 2013-08-29 |
| 259 | WO2013124254A1                            | METHOD FOR CONTACTING A SEMICONDUCTOR SUBSTRATE, MORE PARTICULARLY FOR CONTACTING SOLAR CELLS, AND SOLAR CELLS CONTACTED THEREBY            | 2013-07-25 |
| 260 | US2013148196A1<br>US9213175B2             | MICROSCOPE WITH TUNABLE ACOUSTIC GRADIENT INDEX OF REFRACTION LENS ENABLING MULTIPLE FOCAL PLAN IMAGING                                     | 2013-06-13 |
| 261 | US2013141782A1<br>US9256009B2             | TUNABLE ACOUSTIC GRADIENT INDEX OF REFRACTION LENS AND SYSTEM                                                                               | 2013-06-06 |
| 262 | WO2013081204A1                            | LASER PATTERN PROCESSING APPARATUS USING A DIFFRACTIVE OPTIC ELEMENT                                                                        | 2013-06-06 |
| 263 | US2013063805A1                            | TUNABLE ACOUSTIC GRADIENT INDEX OF REFRACTION LENS AND SYSTEM                                                                               | 2013-03-14 |
| 264 | JP2014522128A<br>JP5753320B2              | LITHOGRAPHIC APPARATUS                                                                                                                      | 2013-02-19 |
| 265 | US2013036928A1<br>US9555644B2             | NON-CONTACT TRANSFER PRINTING                                                                                                               | 2013-01-17 |
| 266 | KR20120139892A                            | METHOD FOR PATTERNING THIN FILM USING VISCOELASTIC FLOW AND SUBSTRATE PATTERNED THE THIN FILM                                               | 2012-12-28 |
| 267 | CN103597404A<br>CN103597404B              | LITHOGRAPHIC APPARATUS, PROGRAMMABLE PATTERNING DEVICE AND LITHOGRAPHIC METHOD                                                              | 2012-10-09 |
| 268 | WO2012066338A2<br>WO2012066338A3          | METHOD AND APPARATUS FOR DIRECT WRITING                                                                                                     | 2012-05-24 |
| 269 | KR101116375B1<br>KR20110138447A           | METHOD OF MANUFACTURING ADHESIVE METAL FILM AND THE METAL FILM                                                                              | 2011-12-28 |
| 270 | US2013176699A1                            | METHOD AND APPARATUS FOR DEPOSITION                                                                                                         | 2011-12-15 |
| 271 | EP2569141A2<br>EP2569141B1                | METHOD FOR PRODUCING AN ORGAN REPLICA, IN PARTICULAR A FUNCTIONAL MODEL                                                                     | 2011-11-17 |
| 272 | US2011278566A1                            | METHOD OF PATTERNING THIN FILM SOLUTION-DEPOSITED                                                                                           | 2011-11-17 |
| 273 | JP2013521033A<br>JP5757961B2              | BIOPRINTING STATION, ASSEMBLY CONTAINING THE BIOPRINTING STATION, AND BIOPRINTING METHOD                                                    | 2011-09-09 |
| 274 | US2011240611A1<br>US8743165B2             | METHODS AND DEVICE FOR LASER PROCESSING                                                                                                     | 2011-09-09 |
| 275 | ES2360778A1<br>ES2360778B1                | APPARATUS AND METHOD FOR DIRECT LASER PRINTING                                                                                              | 2011-01-27 |
| 276 | US2012080088A1                            | METHOD OF CONTACTING A SEMICONDUCTOR SUBSTRATE                                                                                              | 2010-11-11 |
| 277 | KR101039549B1<br>KR20100110447A           | METHOD FOR DIRECT-LASER PATTERNING OF THIN FILM                                                                                             | 2010-10-13 |
| 278 | US2010227133A1<br>US8663754B2             | PULSED LASER MICRO-DEPOSITION PATTERN FORMATION                                                                                             | 2010-09-09 |
| 279 | KR101095855B1<br>KR20100051201A           | PATTERN CLEANING METHOD AND PATTERN CLEANING DEVICE                                                                                         | 2010-05-17 |
| 280 | KR101080672B1<br>KR20100039730A           | METHOD AND SYSTEM FOR TRANSFERRING PATTERN                                                                                                  | 2010-04-16 |
| 281 | KR100973681B1<br>KR20100039734A           | SYSTEM AND METHOD FOR TRANSFERRING PATTERN                                                                                                  | 2010-04-16 |



|     |                                  |                                                                                                                                                    |            |
|-----|----------------------------------|----------------------------------------------------------------------------------------------------------------------------------------------------|------------|
| 282 | US2010035375A1<br>US7682970B2    | MASKLESS NANOFABRICATION OF ELECTRONIC COMPONENTS                                                                                                  | 2010-02-11 |
| 283 | KR100951778B1<br>KR20090123411A  | METHOD FOR PATTERNING THIN FILM BY LASER PRINTING                                                                                                  | 2009-12-02 |
| 284 | US2009274740A1                   | DRUG-LOADED MEDICAL DEVICES AND METHODS FOR MANUFACTURING DRUG-LOADED MEDICAL DEVICES                                                              | 2009-11-05 |
| 285 | US2009217517A1<br>US8056222B2    | LASER-BASED TECHNIQUE FOR THE TRANSFER AND EMBEDDING OF ELECTRONIC COMPONENTS AND DEVICES                                                          | 2009-09-03 |
| 286 | KR100920388B1<br>KR20090079341A  | METHOD FOR PATTERNING THIN-FILM BY PHOTORESIST-FREE LITHOGRAPHY                                                                                    | 2009-07-22 |
| 287 | TW200945339A                     | OPTICAL DISK FORMAT FOR DIRECT WRITING MATERIALS ON A SUBSTRATE                                                                                    | 2009-07-02 |
| 288 | US2009130427A1                   | NANOMATERIAL FACILITATED LASER TRANSFER                                                                                                            | 2009-05-21 |
| 289 | US2011000785A1<br>US8603308B2    | ELECTRICAL PATTERNS FOR BIOSENSOR AND METHOD OF MAKING                                                                                             | 2009-05-07 |
| 290 | CN101821111A<br>CN101821111B     | LASER DECAL TRANSFER OF ELECTRONIC MATERIALS                                                                                                       | 2009-03-19 |
| 291 | US2008314881A1<br>US8101247B2    | SUB-MICRON LASER DIRECT WRITE                                                                                                                      | 2008-12-24 |
| 292 | KR20100016648A                   | IMPROVED THREE-DIMENSIONAL BIOCOMPATIBLE SKELETON STRUCTURE CONTAINING NANOPARTICLES                                                               | 2008-10-30 |
| 293 | US2013330850A1<br>US8684779B2    | ELECTRODE PATTERNING                                                                                                                               | 2008-10-16 |
| 294 | US2016025903A1                   | TUNABLE ACOUSTIC GRADIENT INDEX OF REFRACTION LENS AND SYSTEM                                                                                      | 2008-09-04 |
| 295 | WO2008047144A1                   | METHODS AND APPARATUS FOR THE MANUFACTURE OF MICROSTRUCTURES                                                                                       | 2008-04-24 |
| 296 | CN101443788A<br>CN101443788B     | DEPOSITION REPAIR APPARATUS AND METHODS                                                                                                            | 2007-11-22 |
| 297 | EP1847632A1<br>EP1847632B1       | APPARATUS AND PROCESS FOR THE PREPARATION OF P-TYPE SEMICONDUCTOR ZINC OXIDE FILMS                                                                 | 2007-10-18 |
| 298 | KR100760311B1                    | PATTERNING METHOD OF DISPLAY DEVICE                                                                                                                | 2007-09-20 |
| 299 | WO2007071985A1                   | METHOD OF AND APPARATUS FOR TRANSFERRING MATERIAL FROM A CARRIER TO A SUBSTRATE BY LASER IRRADIATION                                               | 2007-06-28 |
| 300 | US2007105395A1                   | LASER FUNCTIONALIZATION AND PATTERNING OF THICK-FILM INKS                                                                                          | 2007-05-10 |
| 301 | WO2006111766A2<br>WO2006111766A3 | METHODS AND APPARATUS FOR THE MANUFACTURE OF MICROSTRUCTURES                                                                                       | 2006-10-26 |
| 302 | GB2425401A                       | MANUFACTURE OF MICROSTRUCTURES USING PEELABLE MASK                                                                                                 | 2006-10-25 |
| 303 | WO2006061658A1                   | ELECTRODE PATTERNING                                                                                                                               | 2006-06-15 |
| 304 | US7001467B2                      | DIRECT-WRITE LASER TRANSFER AND PROCESSING                                                                                                         | 2006-02-21 |
| 305 | US2005288813A1                   | DIRECT WRITE AND FREEFORM FABRICATION APPARATUS AND METHOD                                                                                         | 2005-09-29 |
| 306 | US2005054121A1<br>US7423286B2    | LASER TRANSFER ARTICLE AND METHOD OF MAKING                                                                                                        | 2005-03-10 |
| 307 | US2005015175A1<br>US7277770B2    | DIRECT WRITE PROCESS AND APPARATUS                                                                                                                 | 2005-01-20 |
| 308 | KR100543139B1<br>KR20050003723A  | CONDUCTIVE PATTERN FABRICATION METHOD FOR ELIMINATING VACUUM PROCESS, MASK, AND PHOTORESIST BY USING DIRECT WIRING METHOD UTILIZING LASER ABLATION | 2005-01-12 |
| 309 | KR101314469B1<br>KR20120048038A  | BATTERY STRUCTURES, SELF-ORGANIZING STRUCTURES AND RELATED METHODS                                                                                 | 2004-06-05 |
| 310 | US2005026037A1<br>US7763382B2    | BIPOLAR ARTICLES AND RELATED METHODS                                                                                                               | 2004-02-05 |
| 311 | WO03101165A1                     | DIRECT-WRITE LASER TRANSFER AND PROCESSING                                                                                                         | 2003-12-04 |
| 312 | CN100595964C<br>CN1864298A       | BATTERY STRUCTURES, SELF-ORGANIZING STRUCTURES AND RELATED METHODS                                                                                 | 2003-02-13 |
| 313 | US2003017277A1<br>US6815015B2    | JETTING BEHAVIOR IN THE LASER FORWARD TRANSFER OF RHEOLOGICAL SYSTEMS                                                                              | 2003-01-23 |
| 314 | US2002197401A1<br>US6805918B2    | LASER FORWARD TRANSFER OF RHEOLOGICAL SYSTEMS                                                                                                      | 2002-12-26 |
| 315 | WO02092674A1                     | LASER FORWARD TRANSFER OF RHEOLOGICAL SYSTEMS                                                                                                      | 2002-11-21 |
| 316 | WO03056320A2<br>WO03056320A3     | FABRICATION OF BIOPOLYMER PATTERNS BY MEANS OF LASER TRANSFER                                                                                      | 2002-11-15 |
| 317 | US2002122898A1<br>US6905738B2    | GENERATION OF VIABLE CELL ACTIVE BIOMATERIAL PATTERNS BY LASER TRANSFER                                                                            | 2002-09-05 |
| 318 | WO02066550A1                     | GENERATION OF BIOMATERIAL MICROARRAYS BY LASER TRANSFER                                                                                            | 2002-08-29 |
| 319 | US2002071901A1<br>US6936311B2    | GENERATION OF BIOMATERIAL MICROARRAYS BY LASER TRANSFER                                                                                            | 2002-06-13 |

|     |             |                                                       |            |
|-----|-------------|-------------------------------------------------------|------------|
| 320 | US6177151B1 | MATRIX ASSISTED PULSED LASER EVAPORATION DIRECT WRITE | 2001-01-23 |
| 321 | WO0044960A1 | MATRIX ASSISTED PULSED LASER EVAPORATION DIRECT WRITE | 2000-08-03 |

### *Patent list from USPTO*

| #  | Number            | Title                                                                                                                                                      | Publication date |
|----|-------------------|------------------------------------------------------------------------------------------------------------------------------------------------------------|------------------|
| 1  | US 20220347778 A1 | LASER PRINTING OF SOLDER PASTES                                                                                                                            | 2022-11-03       |
| 2  | US 20220348859 A1 | LITHOGRAPHIC MASKING FOR SPATIALLY LOCALIZED BIOCHEMICAL STIMULUS DELIVERY                                                                                 | 2022-11-03       |
| 3  | US 11474290 B2    | SEGMENTED LIGHT GUIDE HAVING LIGHT-BLOCKING GROOVE BETWEEN SEGMENTS, AND A METHOD OF MANUFACTURING                                                         | 2022-10-18       |
| 4  | US 11472373 B2    | ENERGY CONTROL COATINGS, STRUCTURES, DEVICES, AND METHODS OF FABRICATION THEREOF                                                                           | 2022-10-18       |
| 5  | US 11476307 B2    | PHOTOVOLTAIC DEVICE AND METHOD OF MANUFACTURING THE SAME                                                                                                   | 2022-10-18       |
| 6  | US 11465173 B2    | KIT AND SYSTEM FOR LASER-INDUCED MATERIAL DISPENSING                                                                                                       | 2022-10-11       |
| 7  | US 11465401 B2    | EJECTOR DEVICE                                                                                                                                             | 2022-10-11       |
| 8  | US 20220296424 A1 | SYSTEM AND METHOD FOR PERSONALIZED IMPLANTABLE SCAFFOLDS FOR WOUND HEALING                                                                                 | 2022-09-22       |
| 9  | US 20220293577 A1 | DISPLAY DEVICE AND DISPLAY UNIT                                                                                                                            | 2022-09-15       |
| 10 | US 11440241 B2    | ADDITIVE MANUFACTURING OF A FREE FORM OBJECT MADE OF MULTICOMPONENT MATERIALS                                                                              | 2022-09-13       |
| 11 | US 20220281253 A1 | ADDITIVE OPTO-THERMOMECHANICAL NANOPRINTING AND NANOREPAIRING UNDER AMBIENT CONDITIONS                                                                     | 2022-09-08       |
| 12 | US 20220266382 A1 | LASER-SEEDING FOR ELECTRO-CONDUCTIVE PLATING                                                                                                               | 2022-08-25       |
| 13 | US 20220260063 A1 | ELECTROSPRAY EMISSION APPARATUS                                                                                                                            | 2022-08-18       |
| 14 | US 11409184 B2    | ACOUSTO-OPTIC DEFLECTOR WITH MULTIPLE OUTPUT BEAMS                                                                                                         | 2022-08-09       |
| 15 | US 20220248540 A1 | HIGH-RESOLUTION SOLDERING                                                                                                                                  | 2022-08-04       |
| 16 | US 20220230944 A1 | CONFIGURABLE LEADED PACKAGE                                                                                                                                | 2022-07-21       |
| 17 | US 11393773 B1    | STRESS ISOLATING INTERPOSER AND SENSOR PACKAGE AND METHOD OF MANUFACTURING THE SAME                                                                        | 2022-07-19       |
| 18 | US 20220219165 A1 | METHOD OF MANUFACTURING A MICROFLUIDIC ARRANGEMENT, METHOD OF OPERATING A MICROFLUIDIC ARRANGEMENT, APPARATUS FOR MANUFACTURING A MICROFLUIDIC ARRANGEMENT | 2022-07-14       |
| 19 | US 20220208701 A1 | PRINTED PACKAGE AND METHOD OF MAKING THE SAME                                                                                                              | 2022-06-30       |
| 20 | US 20220194111 A1 | METHOD AND A DEVICE FOR ASSEMBLY OF A NANOMATERIAL STRUCTURE                                                                                               | 2022-06-23       |
| 21 | US 20220187904 A1 | FLEXIBLE TRANSPARENT MEMBRANE LIGHT EMITTING DIODE ARRAY AND SYSTEMS CONTAINING THE SAME                                                                   | 2022-06-16       |
| 22 | US 20220192030 A1 | CIRCUIT BOARDS HAVING SIDE-MOUNTED COMPONENTS AND ADDITIVE MANUFACTURING METHODS THEREOF                                                                   | 2022-06-16       |
| 23 | US 20220179136 A1 | OPTICAL ELEMENT ARRAY STRUCTURE FOR BIRD COLLISION PREVENTION AND MANUFACTURING METHOD THEREOF                                                             | 2022-06-09       |
| 24 | US 20220167897 A1 | MANUFACTURING OF SKIN-COMPATIBLE ELECTRODES                                                                                                                | 2022-06-02       |
| 25 | US 20220168847 A1 | LASER PROCESSING APPARATUS, METHODS OF OPERATING THE SAME, AND METHODS OF PROCESSING WORKPIECES USING THE SAME                                             | 2022-06-02       |
| 26 | US 20220160547 A1 | DEVICES AND METHODS FOR LASER SURGERY OF AN EYE, ESPECIALLY FOR KERATOPLASTY                                                                               | 2022-05-26       |
| 27 | US 20220152925 A1 | THREE-DIMENSIONAL ADDITIVE PRINTING METHOD                                                                                                                 | 2022-05-19       |
| 28 | US 20220088854 A1 | METHOD FOR TRANSFERRING A MATERIAL                                                                                                                         | 2022-03-24       |
| 29 | US 20220062849 A1 | METHOD AND DEVICE FOR PRODUCING SACCHARIDES AND SACCHARIDE ARRAYS                                                                                          | 2022-03-03       |
| 30 | US 20220057721 A1 | APPARATUS FOR THE EXPOSURE OF PLATE-SHAPED WORKPIECES WITH HIGH THROUGHPUT                                                                                 | 2022-02-24       |
| 31 | US 20220048135 A1 | LASER-PROCESSING APPARATUS, METHODS OF OPERATING THE SAME, AND METHODS OF PROCESSING WORKPIECES USING THE SAME                                             | 2022-02-17       |
| 32 | US 20220040377 A1 | LASER ABLATION/REMOVAL AND LASER INDUCED FORWARD TRANSFER OF BIOLOGICAL MATERIAL                                                                           | 2022-02-10       |
| 33 | US 20220024223 A1 | LIFT PRINTING USING THIN DONOR FOILS                                                                                                                       | 2022-01-27       |
| 34 | US 20220016707 A1 | METHOD FOR LAYER-WISE MANUFACTURING OF A SHAPED BODY                                                                                                       | 2022-01-20       |
| 35 | US 20220009247 A1 | HIGH RESOLUTION LASER INDUCED FORWARD TRANSFER                                                                                                             | 2022-01-13       |
| 36 | US 20210408123 A1 | PHOTOVOLTAIC DEVICE AND METHOD OF MANUFACTURING THE SAME                                                                                                   | 2021-12-30       |

|    |                   |                                                                                                                                                                                          |            |
|----|-------------------|------------------------------------------------------------------------------------------------------------------------------------------------------------------------------------------|------------|
| 37 | US 20210404968 A1 | INDUCTIVELY COUPLED PLASMA TORCH WITH REVERSE VORTEX FLOW AND METHOD OF OPERATION                                                                                                        | 2021-12-30 |
| 38 | US 20210403942 A1 | SYSTEMS FOR CELL CONTROL                                                                                                                                                                 | 2021-12-30 |
| 39 | US 20210402805 A1 | DEVICE                                                                                                                                                                                   | 2021-12-30 |
| 40 | US 20210404921 A1 | PSORIASIS AND OTHER AUTOIMMUNE DISEASES ANTIGEN IMMUNE MODULATOR (AIM) THERAPEUTIC PLATFORM                                                                                              | 2021-12-30 |
| 41 | US 11211569 B2    | LASER PRINTABLE ORGANIC SEMICONDUCTOR COMPOSITIONS AND APPLICATIONS THEREOF                                                                                                              | 2021-12-28 |
| 42 | US 20210394444 A1 | ENCLOSED BIOPRINTING DEVICE                                                                                                                                                              | 2021-12-23 |
| 43 | US 20210379581 A1 | MAGNETIC PCR ASSAY AND USES THEREOF                                                                                                                                                      | 2021-12-09 |
| 44 | US 20210370704 A1 | MULTIPLE COLOR IMAGE                                                                                                                                                                     | 2021-12-02 |
| 45 | US 20210373313 A1 | AUTOFOCUS SAMPLE IMAGING APPARATUS AND METHOD                                                                                                                                            | 2021-12-02 |
| 46 | US 20210370702 A1 | LIGHT IRRADIATION METHOD, LIGHT ABSORBING MATERIAL ATTACHING APPARATUS, FLYING BODY GENERATING METHOD AND APPARATUS, IMAGE FORMING METHOD, AND THREE-DIMENSIONAL OBJECT PRODUCING METHOD | 2021-12-02 |
| 47 | US 20210362431 A1 | METHOD OF APPARATUS FOR FORMING AN OBJECT BY MEANS OF ADDITIVE MANUFACTURING                                                                                                             | 2021-11-25 |
| 48 | US 20210367140 A1 | METHOD FOR APPLYING AT LEAST ONE SILICONE LAYER BY LASER TRANSFER PRINTING                                                                                                               | 2021-11-25 |
| 49 | US 20210362277 A1 | LASER-PROCESSING APPARATUS, METHODS OF OPERATING THE SAME, AND METHODS OF PROCESSING WORKPIECES USING THE SAME                                                                           | 2021-11-25 |
| 50 | US 20210354381 A1 | ROBOTIC BIOPRINTING SYSTEM                                                                                                                                                               | 2021-11-18 |
| 51 | US 20210358792 A1 | METHOD FOR PRODUCING OPTOELECTRONIC DEVICES                                                                                                                                              | 2021-11-18 |
| 52 | US 20210356376 A1 | FUSED-REFERENCE PARTICLE BASED NORMALISATION FOR IMAGING MASS SPECTROMETRY                                                                                                               | 2021-11-18 |
| 53 | US 20210348288 A1 | MENISCUS-CONFINED THREE-DIMENSIONAL ELECTRODEPOSITION                                                                                                                                    | 2021-11-11 |
| 54 | US 20210346985 A1 | FRAME AND EXTERIOR SHROUDING FOR LASER PROCESSING SYSTEM                                                                                                                                 | 2021-11-11 |
| 55 | US 20210339539 A1 | LASER-INDUCED CELL TRANSFER AND SORTING                                                                                                                                                  | 2021-11-04 |
| 56 | US 20210339469 A1 | APPARATUS CONFIGURED TO MODEL THREE-DIMENSIONAL MODELED OBJECT, APPARATUS CONFIGURED TO FLY PARTICLES, AND METHOD OF MODELING THREE-DIMENSIONAL MODELED OBJECT                           | 2021-11-04 |
| 57 | US 20210333173 A1 | HIGH SPEED MODULATION SAMPLE IMAGING APPARATUS AND METHOD                                                                                                                                | 2021-10-28 |
| 58 | US 20210310082 A1 | TOBACCO TRANSGENIC EVENT AND METHODS FOR DETECTION AND USE THEREOF                                                                                                                       | 2021-10-07 |
| 59 | US 20210286120 A1 | A SEGMENTED LIGHT GUIDE AND A METHOD OF MANUFACTURING THEREOF                                                                                                                            | 2021-09-16 |
| 60 | US 11117217 B1    | METAL FILM FOR ADDITIVE METAL MANUFACTURING                                                                                                                                              | 2021-09-14 |
| 61 | US 20210282269 A1 | PRINTED CIRCUIT BOARDS IMPREGNATED WITH CARBON NANO TUBES                                                                                                                                | 2021-09-09 |
| 62 | US 20210252782 A1 | THREE-DIMENSIONAL MODELING APPARATUS AND THREE-DIMENSIONAL MODELING METHOD                                                                                                               | 2021-08-19 |
| 63 | US 20210239707 A1 | REAGENTS AND METHODS FOR ELEMENTAL MASS SPECTROMETRY OF BIOLOGICAL SAMPLES                                                                                                               | 2021-08-05 |
| 64 | US 11077664 B2    | SYSTEMS AND METHODS FOR CONTROLLING THE MORPHOLOGY AND POROSITY OF PRINTED REACTIVE INKS FOR HIGH PRECISION PRINTING                                                                     | 2021-08-03 |
| 65 | US 20210229983 A1 | METHOD FOR CLOSING OPENINGS IN A FLEXIBLE DIAPHRAGM OF A MEMS ELEMENT                                                                                                                    | 2021-07-29 |
| 66 | US 20210227697 A1 | A PROCESS FOR THE MANUFACTURING OF PRINTED CONDUCTIVE TRACKS ON AN OBJECT AND 3D PRINTED ELECTRONICS                                                                                     | 2021-07-22 |
| 67 | US 20210205813 A1 | CONTACTLESS LIQUID LOADING TO MICROFLUIDIC DEVICES                                                                                                                                       | 2021-07-08 |
| 68 | US 11053156 B2    | METHOD OF CLOSED FORM RELEASE FOR BRITTLE MATERIALS USING BURST ULTRAFAST LASER PULSES                                                                                                   | 2021-07-06 |
| 69 | US 20210181186 A1 | REAGENTS AND METHODS FOR ELEMENTAL IMAGING MASS SPECTROMETRY OF BIOLOGICAL SAMPLES                                                                                                       | 2021-06-17 |
| 70 | US 20210168943 A1 | METHOD FOR MANUFACTURING A CONDUCTOR STRUCTURAL ELEMENT AND CONDUCTOR STRUCTURAL ELEMENT                                                                                                 | 2021-06-03 |
| 71 | US 20210155023 A1 | ARCHITECTED STAMPS FOR LIQUID TRANSFER PRINTING                                                                                                                                          | 2021-05-27 |
| 72 | US 20210157238 A1 | METHODS AND SYSTEMS FOR PRODUCING THREE-DIMENSIONAL ELECTRONIC PRODUCTS                                                                                                                  | 2021-05-27 |
| 73 | US 20210139321 A1 | LASER-ASSISTED MATERIAL PHASE-CHANGE AND EXPULSION MICRO-MACHINING PROCESS                                                                                                               | 2021-05-13 |
| 74 | US 20210129433 A1 | SYSTEMS FOR MATERIAL DEPOSITION                                                                                                                                                          | 2021-05-06 |
| 75 | US 20210118661 A1 | HIGH RESOLUTION IMAGING APPARATUS AND METHOD                                                                                                                                             | 2021-04-22 |
| 76 | US 20210107091 A1 | METHOD AND SYSTEM FOR EXTENDING OPTICS LIFETIME IN LASER PROCESSING APPARATUS                                                                                                            | 2021-04-15 |
| 77 | US 20210094125 A1 | METHOD FOR MICROWELDING FLEXIBLE THIN FILMS, FOR EXAMPLE FOR USE IN ELECTRICAL AND ELECTRONIC DEVICES                                                                                    | 2021-04-01 |

|     |                   |                                                                                                                                    |            |
|-----|-------------------|------------------------------------------------------------------------------------------------------------------------------------|------------|
| 78  | US 20210087670 A1 | LIFT DEPOSITION APPARATUS AND METHOD                                                                                               | 2021-03-25 |
| 79  | US 20210090945 A1 | SYSTEM AND METHOD FOR INTERCONNECTION                                                                                              | 2021-03-25 |
| 80  | US 20210069971 A1 | SYSTEM FOR DEPOSITING MATERIAL AND ASSOCIATED METHOD                                                                               | 2021-03-11 |
| 81  | US 20210053297 A1 | METHODS AND SYSTEMS FOR CONTROLLING TEMPERATURE ACROSS A REGION DEFINED BY USING THERMALLY CONDUCTIVE ELEMENTS                     | 2021-02-25 |
| 82  | US 20210057311 A1 | METHOD AND SYSTEM OF STRETCHING AN ACCEPTOR SUBSTRATE TO ADJUST PLACEMENT OF A COMPONENT                                           | 2021-02-25 |
| 83  | US 20210047532 A1 | TWO-COMPONENT PRINTABLE CONDUCTIVE COMPOSITION                                                                                     | 2021-02-18 |
| 84  | US 20210045252 A1 | SYSTEMS AND METHODS FOR MANUFACTURING                                                                                              | 2021-02-11 |
| 85  | US 20210032739 A1 | DYNAMIC RELEASE MIRROR STRUCTURE FOR LASER-INDUCED FORWARD TRANSFER                                                                | 2021-02-04 |
| 86  | US 20210023772 A1 | METHOD AND APPARATUS FOR CREATING AND SINTERING FINE LINES AND PATTERNS                                                            | 2021-01-28 |
| 87  | US 20210028141 A1 | ELECTRICAL INTERCONNECTION OF CIRCUIT ELEMENTS ON A SUBSTRATE WITHOUT PRIOR PATTERNING                                             | 2021-01-28 |
| 88  | US 10883136 B2    | METHOD OF ISOLATING BIOCHEMICAL MOLECULES ON MICROARRAY SUBSTRATE                                                                  | 2021-01-05 |
| 89  | US 20200387009 A1 | CONTACT LENSES WITH MICROCHANNELS                                                                                                  | 2020-12-10 |
| 90  | US 20200376486 A1 | METHODS AND APPARATUS FOR MANUFACTURING A MICROFLUIDIC ARRANGEMENT, AND A MICROFLUIDIC ARRANGEMENT                                 | 2020-12-03 |
| 91  | US 20200371107 A1 | METHOD FOR SELECTING, MANIPULATING AND ISOLATING CIRCULATING TUMOR CELLS IN BODY FLUIDS BY LASER-ASSISTED TRANSFER                 | 2020-11-26 |
| 92  | US 20200354660 A1 | SYSTEM AND METHOD FOR ORGANOID CULTURE                                                                                             | 2020-11-12 |
| 93  | US 20200350275 A1 | METHOD TO ELECTRICALLY CONNECT CHIP WITH TOP CONNECTORS USING 3D PRINTING                                                          | 2020-11-05 |
| 94  | US 10808794 B1    | TOPOLOGICAL DAMPING MATERIALS AND METHODS THEREOF                                                                                  | 2020-10-20 |
| 95  | US 20200324564 A1 | DUAL BEAM LASER TRANSFER                                                                                                           | 2020-10-15 |
| 96  | US 20200261191 A1 | 3D FABRICATION FOR DENTAL APPLICATIONS BASED ON ABLATION                                                                           | 2020-08-20 |
| 97  | US 20200250856 A1 | CALIBRATION OF A LIGHT-FIELD IMAGING SYSTEM                                                                                        | 2020-08-06 |
| 98  | US 20200215633 A1 | SOLDER PASTE LASER INDUCED FORWARD TRANSFER DEVICE AND METHOD                                                                      | 2020-07-09 |
| 99  | US 20200194721 A1 | DISPLAY DEVICE                                                                                                                     | 2020-06-18 |
| 100 | US 20200194616 A1 | LIGHT EMITTING DIODE (LED) MASS-TRANSFER APPARATUS AND METHOD OF MANUFACTURE                                                       | 2020-06-18 |
| 101 | US 20200179562 A1 | ADDITIVE MANUFACTURING USING RECOMBINANT COLLAGEN-CONTAINING FORMULATION                                                           | 2020-06-11 |
| 102 | US 20200172444 A1 | SLIP AND PROCESS FOR THE PRODUCTION OF CERAMIC AND GLASS CERAMIC 3D STRUCTURES                                                     | 2020-06-04 |
| 103 | US 20200171700 A1 | SUPPORT MATERIAL FOR ENERGY-PULSE-INDUCED TRANSFER PRINTING                                                                        | 2020-06-04 |
| 104 | US 20200172747 A1 | PROCESS AND MATERIAL FOR PRODUCING 3D OBJECTS BY ENERGY-PULSE-INDUCED TRANSFER PRINTING                                            | 2020-06-04 |
| 105 | US 20200166438 A1 | TISSUE MARKING SYSTEM                                                                                                              | 2020-05-28 |
| 106 | US 20200139935 A1 | ENERGY CONTROL COATINGS, STRUCTURES, DEVICES, AND METHODS OF FABRICATION THEREOF                                                   | 2020-05-07 |
| 107 | US 20200108172 A1 | COMPOSITIONS INCLUDING GELATIN NANOPARTICLES AND METHODS OF USE THEREOF                                                            | 2020-04-09 |
| 108 | US 20200102529 A1 | EQUIPMENT AND METHOD FOR ADDITIVE MANUFACTURING                                                                                    | 2020-04-02 |
| 109 | US 20200096448 A1 | METHOD AND DEVICE FOR PROVIDING A CELL LINE HAVING A DESIRED TARGET PROTEIN EXPRESSION                                             | 2020-03-26 |
| 110 | US 10600739 B1    | INTERPOSER WITH INTERCONNECTS AND METHODS OF MANUFACTURING THE SAME                                                                | 2020-03-24 |
| 111 | US 20200070514 A1 | SYSTEM AND METHOD FOR LASER INDUCED FORWARD TRANSFER COMPRISING A MICROFLUIDIC CHIP PRINT HEAD WITH A RENEWABLE INTERMEDIATE LAYER | 2020-03-05 |
| 112 | US 20200046520 A1 | BIOPRINTING PROCESS                                                                                                                | 2020-02-13 |
| 113 | US 20200033359 A1 | IMMUNE PROFILING OF TUMOR TISSUE                                                                                                   | 2020-01-30 |
| 114 | US 20200023584 A1 | FABRICATION AND DESIGN OF COMPOSITES WITH ARCHITECTED LAYERS                                                                       | 2020-01-23 |
| 115 | US 20200009877 A1 | DEVICE AND METHOD FOR THE DEPOSITION OF PARTICLES ON A TARGET                                                                      | 2020-01-09 |
| 116 | US 20190367884 A1 | THREE-DIMENSIONAL TUMOR MODELS, METHODS OF MANUFACTURING SAME AND USES THEREOF                                                     | 2019-12-05 |
| 117 | US 20190352430 A1 | COMPOSITIONS AND METHODS RELATED TO 2 DIMENSIONAL MOLECULAR COMPOSITES                                                             | 2019-11-21 |
| 118 | US 10451953 B2    | ACOUSTO-OPTIC DEFLECTOR WITH MULTIPLE OUTPUT BEAMS                                                                                 | 2019-10-22 |

|     |                   |                                                                                                                                                                                    |            |
|-----|-------------------|------------------------------------------------------------------------------------------------------------------------------------------------------------------------------------|------------|
| 119 | US 10446720 B2    | SEMICONDUCTOR STRUCTURE, LIGHT-EMITTING DEVICE AND MANUFACTURING METHOD FOR THE SAME                                                                                               | 2019-10-15 |
| 120 | US 20190312157 A1 | LASER ASSISTED METALLIZATION PROCESS FOR SOLAR CELL FABRICATION                                                                                                                    | 2019-10-10 |
| 121 | US 20190312163 A1 | LASER ASSISTED METALLIZATION PROCESS FOR SOLAR CELL STRINGING                                                                                                                      | 2019-10-10 |
| 122 | US 20190308270 A1 | SYSTEMS FOR LASER ASSISTED METALLIZATION OF SUBSTRATES                                                                                                                             | 2019-10-10 |
| 123 | US 20190301006 A1 | COMPOSITION SUITABLE FOR APPLICATION WITH LASER INDUCED FORWARD TRANSFER (LIFT)                                                                                                    | 2019-10-03 |
| 124 | US 20190279771 A1 | SRM/MRM ASSAYS FOR PROFILING TUMOR TISSUE                                                                                                                                          | 2019-09-12 |
| 125 | US 20190263054 A1 | HYBRID, MULTI-MATERIAL 3D PRINTING                                                                                                                                                 | 2019-08-29 |
| 126 | US 10391588 B2    | METHOD AND SYSTEM FOR SCRIBING BRITTLE MATERIAL FOLLOWED BY CHEMICAL ETCHING                                                                                                       | 2019-08-27 |
| 127 | US 20190237599 A1 | METHOD FOR PRODUCING ELECTRICAL CONTACTS ON A COMPONENT                                                                                                                            | 2019-08-01 |
| 128 | US 20190193444 A1 | METHOD AND SYSTEM FOR APPLYING A PATTERNED STRUCTURE ON A SURFACE                                                                                                                  | 2019-06-27 |
| 129 | US 20190184189 A1 | LASER INDUCED BALLISTIC PARTICLE IMPLANTATION TECHNIQUE                                                                                                                            | 2019-06-20 |
| 130 | US 20190169457 A1 | PROCESSING OF POLYMER BASED INKS AND PASTES                                                                                                                                        | 2019-06-06 |
| 131 | US 20190143449 A1 | METAL DROPLET JETTING SYSTEM                                                                                                                                                       | 2019-05-16 |
| 132 | US 20190110367 A1 | COMPONENT CARRIER HAVING A THREE DIMENSIONALLY PRINTED WIRING STRUCTURE                                                                                                            | 2019-04-11 |
| 133 | US 10252507 B2    | METHOD AND APPARATUS FOR FORWARD DEPOSITION OF MATERIAL ONTO A SUBSTRATE USING BURST ULTRAFAST LASER PULSE ENERGY                                                                  | 2019-04-09 |
| 134 | US 10254499 B1    | ADDITIVE MANUFACTURING OF ACTIVE DEVICES USING DIELECTRIC, CONDUCTIVE AND MAGNETIC MATERIALS                                                                                       | 2019-04-09 |
| 135 | US 20190104618 A1 | METHOD FOR SOLVENT-FREE PRINTING CONDUCTORS ON SUBSTRATE                                                                                                                           | 2019-04-04 |
| 136 | US 20190094113 A1 | CELL SORTING                                                                                                                                                                       | 2019-03-28 |
| 137 | US 10214833 B1    | ADDITIVE MANUFACTURING OF CRYSTALLINE MATERIALS                                                                                                                                    | 2019-02-26 |
| 138 | US 10191550 B1    | FABRIC DEVICES WITH SHAPE MEMORY ALLOY WIRES THAT PROVIDE HAPTIC FEEDBACK                                                                                                          | 2019-01-29 |
| 139 | US 20190019736 A1 | LASER-SEEDING FOR ELECTRO-CONDUCTIVE PLATING                                                                                                                                       | 2019-01-17 |
| 140 | US 20190001442 A1 | LASER PROCESSING APPARATUS, METHODS OF LASER-PROCESSING WORKPIECES AND RELATED ARRANGEMENTS                                                                                        | 2019-01-03 |
| 141 | US 20190001434 A1 | LOCATION OF IMAGE PLANE IN A LASER PROCESSING SYSTEM                                                                                                                               | 2019-01-03 |
| 142 | US 20180370116 A1 | THREE-DIMENSIONAL PRINTING OF REACTIVE MATERIALS USING INTERSECTING JETS                                                                                                           | 2018-12-27 |
| 143 | US 20180371389 A1 | METHOD AND APPARATUS FOR GENERATING THREE-DIMENSIONAL PATTERNED SOFT STRUCTURES AND USES THEREOF                                                                                   | 2018-12-27 |
| 144 | US 20180354074 A1 | METHOD FOR JOINING TWO COMPONENTS IN THE REGION OF A JOINT ZONE BY MEANS OF AT LEAST ONE LASER BEAM, AND METHOD FOR GENERATING A CONTINUOUS JOINT SEAM                             | 2018-12-13 |
| 145 | US 10144088 B2    | METHOD AND APPARATUS FOR LASER PROCESSING OF SILICON BY FILAMENTATION OF BURST ULTRAFAST LASER PULSES                                                                              | 2018-12-04 |
| 146 | US 20180323139 A1 | METHOD FOR MANUFACTURING A DEVICE WITH INTEGRATED-CIRCUIT CHIP BY DIRECT DEPOSIT OF CONDUCTIVE MATERIAL                                                                            | 2018-11-08 |
| 147 | US 20180281243 A1 | CONTROL OF SURFACE PROPERTIES OF PRINTED THREE-DIMENSIONAL STRUCTURES                                                                                                              | 2018-10-04 |
| 148 | US 20180261582 A1 | INORGANIC LIGHT EMITTING DIODE (ILED) ASSEMBLY VIA DIRECT BONDING                                                                                                                  | 2018-09-13 |
| 149 | US 20180193948 A1 | CONTROL OF LIFT EJECTION ANGLE                                                                                                                                                     | 2018-07-12 |
| 150 | US 10005152 B2    | METHOD AND APPARATUS FOR SPIRAL CUTTING A GLASS TUBE USING FILAMENTATION BY BURST ULTRAFAST LASER PULSES                                                                           | 2018-06-26 |
| 151 | US 20180171468 A1 | METHOD FOR DEPOSITING A FUNCTIONAL MATERIAL ON A SUBSTRATE                                                                                                                         | 2018-06-21 |
| 152 | US 20180112277 A1 | SIGNAL DIRECTED DISSECTION TO INFORM CANCER THERAPY STRATEGY                                                                                                                       | 2018-04-26 |
| 153 | US 20180111177 A1 | SINGLE PROCEDURE INDICATORS                                                                                                                                                        | 2018-04-26 |
| 154 | US 20180110127 A1 | PRINTING METHOD USING TWO LASERS                                                                                                                                                   | 2018-04-19 |
| 155 | US 20180090314 A1 | METHODS AND APPARATUS FOR PRINTING HIGH-VISCOSITY MATERIALS                                                                                                                        | 2018-03-29 |
| 156 | US 9925509 B2     | METHOD FOR COMBINATORIAL PARTICLE MANIPULATION FOR PRODUCING HIGH-DENSITY MOLECULE ARRAYS, IN PARTICULAR PEPTIDE ARRAYS, AND MOLECULE ARRAYS THAT CAN BE OBTAINED BY MEANS THEREOF | 2018-03-27 |
| 157 | US 20180074457 A1 | NEAR-TO-EYE AND SEE-THROUGH HOLOGRAPHIC DISPLAYS                                                                                                                                   | 2018-03-15 |
| 158 | US 20180050550 A1 | MULTI-TECHNOLOGY PRINTING SYSTEM                                                                                                                                                   | 2018-02-22 |
| 159 | US 9878536 B2     | ACOUSTOPHORETIC PRINTING APPARATUS AND METHOD                                                                                                                                      | 2018-01-30 |
| 160 | US 20180015671 A1 | RECURRING PROCESS FOR LASER INDUCED FORWARD TRANSFER AND HIGH THROUGHPUT AND RECYCLING OF DONOR MATERIAL BY THE                                                                    | 2018-01-18 |

|     |                   |                                                                                                                                           |            |
|-----|-------------------|-------------------------------------------------------------------------------------------------------------------------------------------|------------|
|     |                   | REUSE OF A PLURALITY OF TARGET SUBSTRATE PLATES OR FORWARD TRANSFER OF A PATTERN OF DISCRETE DONOR DOTS                                   |            |
| 161 | US 20180015502 A1 | KIT AND SYSTEM FOR LASER-INDUCED MATERIAL DISPENSING                                                                                      | 2018-01-18 |
| 162 | US 20170368822 A1 | LASER PRINTING METHOD AND DEVICE FOR IMPLEMENTING SAID METHOD                                                                             | 2017-12-28 |
| 163 | US 20170361346 A1 | MASKLESS PAINTING AND PRINTING                                                                                                            | 2017-12-21 |
| 164 | US 20170365484 A1 | PRINTING OF THREE-DIMENSIONAL METAL STRUCTURES WITH A SACRIFICIAL SUPPORT                                                                 | 2017-12-21 |
| 165 | US 20170320263 A1 | METHOD FOR LASER PRINTING BIOLOGICAL COMPONENTS, AND DEVICE FOR IMPLEMENTING SAID METHOD                                                  | 2017-11-09 |
| 166 | US 20170306495 A1 | ANGLED LIFT JETTING                                                                                                                       | 2017-10-26 |
| 167 | US 20170268100 A1 | METHOD FOR DEPOSITING A FUNCTIONAL MATERIAL ON A SUBSTRATE                                                                                | 2017-09-21 |
| 168 | US 9765934 B2     | THERMALLY MANAGED LED ARRAYS ASSEMBLED BY PRINTING                                                                                        | 2017-09-19 |
| 169 | US 9757815 B2     | METHOD AND APPARATUS FOR PERFORMING LASER CURVED FILAMENTATION WITHIN TRANSPARENT MATERIALS                                               | 2017-09-12 |
| 170 | US 20170250294 A1 | LIFT PRINTING OF CONDUCTIVE TRACES ONTO A SEMICONDUCTOR SUBSTRATE                                                                         | 2017-08-31 |
| 171 | US 20170210142 A1 | LIFT PRINTING SYSTEM                                                                                                                      | 2017-07-27 |
| 172 | US 20170205063 A1 | LIGHT SOURCE COOLING BODY, LIGHT SOURCE ASSEMBLY, A LUMINAIRE AND METHOD TO MANUFACTURE A LIGHT SOURCE COOLING OR A LIGHT SOURCE ASSEMBLY | 2017-07-20 |
| 173 | US 20170189995 A1 | PRINTING OF 3D STRUCTURES BY LASER-INDUCED FORWARD TRANSFER                                                                               | 2017-07-06 |
| 174 | US 20170161428 A1 | SPATIAL GENOMICS WITH CO-REGISTERED HISTOLOGY                                                                                             | 2017-06-08 |
| 175 | US 20170136694 A1 | ADDITIVE MANUFACTURE OF COMPOSITE MATERIALS                                                                                               | 2017-05-18 |
| 176 | US 20170103902 A1 | LASER-INDUCED FORMING AND TRANSFER OF SHAPED METALLIC INTERCONNECTS                                                                       | 2017-04-13 |
| 177 | US 20170072504 A1 | QUBITS BY SELECTIVE LASER-MODULATED DEPOSITION                                                                                            | 2017-03-16 |
| 178 | US 20170071062 A1 | PRINTING HIGH ASPECT RATIO PATTERNS                                                                                                       | 2017-03-09 |
| 179 | US 20170028626 A1 | COMPACT DROP-ON-DEMAND APPARATUS USING LIGHT ACTUATION THROUGH OPTICAL FIBERS                                                             | 2017-02-02 |
| 180 | US 20170014958 A1 | STABLE UNDERCOOLED METALLIC PARTICLES FOR ENGINEERING AT AMBIENT CONDITIONS                                                               | 2017-01-19 |
| 181 | US 20170002344 A1 | ISOLATION OF MICRONICHES FROM SOLID-PHASE AND SOLID SUSPENSION IN LIQUID PHASE MICROBIOMES USING LASER INDUCED FORWARD TRANSFER           | 2017-01-05 |
| 182 | US 20160367358 A1 | 3D PRINTER                                                                                                                                | 2016-12-22 |
| 183 | US 20160368211 A1 | 3D PRINTER                                                                                                                                | 2016-12-22 |
| 184 | US 9517929 B2     | METHOD OF FABRICATING ELECTROMECHANICAL MICROCHIPS WITH A BURST ULTRAFAST LASER PULSES                                                    | 2016-12-13 |
| 185 | US 20160330841 A1 | ELECTRONIC MODULE, METHOD FOR MANUFACTURING SAME AND ELECTRONIC DEVICE COMPRISING A MODULE OF SAID TYPE                                   | 2016-11-10 |
| 186 | US 20160259250 A1 | METHOD AND SYSTEM FOR FORMING A PATTERNED STRUCTURE ON A SUBSTRATE                                                                        | 2016-09-08 |
| 187 | US 20160246892 A1 | MULTIMODE IMAGE AND SPECTRAL READER                                                                                                       | 2016-08-25 |
| 188 | US 20160243286 A1 | TISSUE ENGINEERED DEVICES AND METHODS FOR MAKING SAME                                                                                     | 2016-08-25 |
| 189 | US 20160233089 A1 | LIFT PRINTING OF MULTI-COMPOSITION MATERIAL STRUCTURES                                                                                    | 2016-08-11 |
| 190 | US 20160194590 A1 | STRUCTURED BIOLOGICAL SAMPLES FOR ANALYSIS BY MASS CYTOMETRY                                                                              | 2016-07-07 |
| 191 | US 20160176110 A1 | EJECTOR DEVICE                                                                                                                            | 2016-06-23 |
| 192 | US 20160172595 A1 | METHOD FOR LITHOGRAPHIC PATTERNING OF ORGANIC LAYERS                                                                                      | 2016-06-16 |
| 193 | US 20160158886 A1 | INTERFEROMETRIC LASER PROCESSING                                                                                                          | 2016-06-09 |
| 194 | US 9328366 B2     | METHOD FOR MASS PRODUCTION OF HIGH-PURITY OLIGONUCLEOTIDES                                                                                | 2016-05-03 |
| 195 | US 9290671 B1     | LOW COST SEMICONDUCTING ALLOY NANOPARTICLES INK AND MANUFACTURING PROCESS THEREOF                                                         | 2016-03-22 |
| 196 | US 20160076088 A1 | LASER MARKING FOR AUTHENTICATION AND TRACKING                                                                                             | 2016-03-17 |
| 197 | US 9284409 B2     | ENDOPROSTHESIS HAVING A NON-FOULING SURFACE                                                                                               | 2016-03-15 |
| 198 | US 20160038647 A1 | THIN-FILM COATED FLUOROPOLYMER CATHETER                                                                                                   | 2016-02-11 |
| 199 | US 20160036083 A1 | ELECTROACTIVE CULTURES AND APPARATUSES THEREFOR                                                                                           | 2016-02-04 |
| 200 | US 20160020343 A1 | LASER-TRANSFERRED IBC SOLAR CELLS                                                                                                         | 2016-01-21 |
| 201 | US 20150374920 A1 | METHOD AND DEVICE FOR INJECTING A DRUG                                                                                                    | 2015-12-31 |
| 202 | US 9222753 B2     | RETICLE FOR A TELESCOPE                                                                                                                   | 2015-12-29 |
| 203 | US 20150294872 A1 | METHOD FOR CREATING ELECTRICAL CONTACTS AND CONTACTS CREATED IN THIS WAY                                                                  | 2015-10-15 |
| 204 | US 20150239274 A1 | MULTI-TECHNOLOGY PRINTING SYSTEM                                                                                                          | 2015-08-27 |

|     |                   |                                                                                                                             |            |
|-----|-------------------|-----------------------------------------------------------------------------------------------------------------------------|------------|
| 205 | US 20150200370 A1 | METHOD AND SYSTEM FOR DIVIDING A BARRIER FOIL                                                                               | 2015-07-16 |
| 206 | US 20150122174 A1 | DIE FOR DEPOSITING AT LEAST ONE CONDUCTIVE FLUID ONTO A SUBSTRATE, AND DEVICE INCLUDING SUCH A MATRIX AND DEPOSITION METHOD | 2015-05-07 |
| 207 | US 20150086705 A1 | DONOR SHEET AND METHOD FOR LIGHT INDUCED FORWARD TRANSFER MANUFACTURING                                                     | 2015-03-26 |
| 208 | US 20150072873 A1 | METHOD AND APPARATUS FOR PRODUCING SEQUENCE VERIFIED DNA                                                                    | 2015-03-12 |
| 209 | US 8932346 B2     | MEDICAL DEVICES HAVING INORGANIC PARTICLE LAYERS                                                                            | 2015-01-13 |
| 210 | US 8920491 B2     | MEDICAL DEVICES HAVING A COATING OF INORGANIC MATERIAL                                                                      | 2014-12-30 |
| 211 | US 8916796 B2     | METHOD FOR DEPOSITING AND CURING NANOPARTICLE-BASED INK                                                                     | 2014-12-23 |
| 212 | US 8900292 B2     | COATING FOR MEDICAL DEVICE HAVING INCREASED SURFACE AREA                                                                    | 2014-12-02 |
| 213 | US 20140308669 A1 | METHODS FOR OBTAINING SINGLE CELLS AND APPLICATIONS OF SINGLE CELL OMICS                                                    | 2014-10-16 |
| 214 | US 20140287953 A1 | LASER ABLATION CELL                                                                                                         | 2014-09-25 |
| 215 | US 20140268088 A1 | MECHANICALLY PRODUCED ALIGNMENT FIDUCIAL METHOD AND DEVICE                                                                  | 2014-09-18 |
| 216 | US 20140238592 A1 | SELECTIVE LASER-ASSISTED TRANSFER OF DISCRETE COMPONENTS                                                                    | 2014-08-28 |
| 217 | US 8815275 B2     | COATINGS FOR MEDICAL DEVICES COMPRISING A THERAPEUTIC AGENT AND A METALLIC MATERIAL                                         | 2014-08-26 |
| 218 | US 8815273 B2     | DRUG ELUTING MEDICAL DEVICES HAVING POROUS LAYERS                                                                           | 2014-08-26 |
| 219 | US 8771343 B2     | MEDICAL DEVICES WITH SELECTIVE TITANIUM OXIDE COATINGS                                                                      | 2014-07-08 |
| 220 | US 8753855 B2     | METHOD FOR DETACHING CULTURED CELLS, CELL DETACHMENT DEVICE USED IN SAID METHOD FOR DETACHING CULTURED CELLS, AND INCUBATOR | 2014-06-17 |
| 221 | US 20140160452 A1 | LITHOGRAPHIC APPARATUS, PROGRAMMABLE PATTERNING DEVICE AND LITHOGRAPHIC METHOD                                              | 2014-06-12 |
| 222 | US 20140155297 A1 | METHOD AND APPARATUS FOR LIGHT BASED RECOVERY OF SEQUENCE VERIFIED DNA                                                      | 2014-06-05 |
| 223 | US 8734915 B2     | FILM-FORMATION METHOD AND MANUFACTURING METHOD OF LIGHT-EMITTING DEVICE                                                     | 2014-05-27 |
| 224 | US 20140071421 A1 | LITHOGRAPHIC APPARATUS, PROGRAMMABLE PATTERNING DEVICE AND LITHOGRAPHIC METHOD                                              | 2014-03-13 |
| 225 | US 20130335504 A1 | OPTICAL WRITER FOR FLEXIBLE FOILS                                                                                           | 2013-12-19 |
| 226 | US 8574615 B2     | MEDICAL DEVICES HAVING NANOPOROUS COATINGS FOR CONTROLLED THERAPEUTIC AGENT DELIVERY                                        | 2013-11-05 |
| 227 | US 20130176699 A1 | METHOD AND APPARATUS FOR DEPOSITION                                                                                         | 2013-07-11 |
| 228 | US 8449603 B2     | ENDOPROSTHESIS COATING                                                                                                      | 2013-05-28 |
| 229 | US 20130130306 A1 | ZN (II) BASED COLORIMETRIC SENSOR AND PROCESS FOR THE PREPARATION THEREOF                                                   | 2013-05-23 |
| 230 | US 8431149 B2     | COATED MEDICAL DEVICES FOR ABLUMINAL DRUG DELIVERY                                                                          | 2013-04-30 |
| 231 | US 20130059280 A1 | METHOD FOR PRODUCING AN ORGAN REPLICA, IN PARTICULAR A FUNCTIONAL MODEL                                                     | 2013-03-07 |
| 232 | US 20130036928 A1 | NON-CONTACT TRANSFER PRINTING                                                                                               | 2013-02-14 |
| 233 | US 20130017564 A1 | BIOPRINTING STATION, ASSEMBLY COMPRISING SUCH BIOPRINTING STATION AND BIOPRINTING METHOD                                    | 2013-01-17 |
| 234 | US 8353949 B2     | MEDICAL DEVICES WITH DRUG-ELUTING COATING                                                                                   | 2013-01-15 |
| 235 | US 8287937 B2     | ENDOPROSTHESE                                                                                                               | 2012-10-16 |
| 236 | US 8231980 B2     | MEDICAL IMPLANTS INCLUDING IRIIDIUM OXIDE                                                                                   | 2012-07-31 |
| 237 | US 8221822 B2     | MEDICAL DEVICE COATING BY LASER CLADDING                                                                                    | 2012-07-17 |
| 238 | US 8216632 B2     | ENDOPROSTHESIS COATING                                                                                                      | 2012-07-10 |
| 239 | US 8187620 B2     | MEDICAL DEVICES COMPRISING A POROUS METAL OXIDE OR METAL MATERIAL AND A POLYMER COATING FOR DELIVERING THERAPEUTIC AGENTS   | 2012-05-29 |
| 240 | US 20120080088 A1 | METHOD OF CONTACTING A SEMICONDUCTOR SUBSTRATE                                                                              | 2012-04-05 |
| 241 | US 8070797 B2     | MEDICAL DEVICE WITH A POROUS SURFACE FOR DELIVERY OF A THERAPEUTIC AGENT                                                    | 2011-12-06 |
| 242 | US 8071156 B2     | ENDOPROSTHESES                                                                                                              | 2011-12-06 |
| 243 | US 8067054 B2     | STENTS WITH CERAMIC DRUG RESERVOIR LAYER AND METHODS OF MAKING AND USING THE SAME                                           | 2011-11-29 |
| 244 | US 8066763 B2     | DRUG-RELEASING STENT WITH CERAMIC-CONTAINING LAYER                                                                          | 2011-11-29 |
| 245 | US 20110278269 A1 | METHOD AND SYSTEM FOR ELECTRICAL CIRCUIT REPAIR                                                                             | 2011-11-17 |
| 246 | US 20110278566 A1 | METHOD OF PATTERNING THIN FILM SOLUTION-DEPOSITED                                                                           | 2011-11-17 |
| 247 | US 20110240611 A1 | METHODS AND DEVICE FOR LASER PROCESSING                                                                                     | 2011-10-06 |
| 248 | US 8029554 B2     | STENT WITH EMBEDDED MATERIAL                                                                                                | 2011-10-04 |
| 249 | US 20110207328 A1 | METHODS AND APPARATUS FOR THE MANUFACTURE OF MICROSTRUCTURES                                                                | 2011-08-25 |
| 250 | US 8002823 B2     | ENDOPROSTHESIS COATING                                                                                                      | 2011-08-23 |

|     |                   |                                                                                                                                        |            |
|-----|-------------------|----------------------------------------------------------------------------------------------------------------------------------------|------------|
| 251 | US 7981150 B2     | ENDOPROSTHESIS WITH COATINGS                                                                                                           | 2011-07-19 |
| 252 | US 7976915 B2     | ENDOPROSTHESIS WITH SELECT CERAMIC MORPHOLOGY                                                                                          | 2011-07-12 |
| 253 | US 7942926 B2     | ENDOPROSTHESIS COATING                                                                                                                 | 2011-05-17 |
| 254 | US 7938855 B2     | DEFORMABLE UNDERLAYER FOR STENT                                                                                                        | 2011-05-10 |
| 255 | US 7931683 B2     | ARTICLES HAVING CERAMIC COATED SURFACES                                                                                                | 2011-04-26 |
| 256 | US 7927454 B2     | METHOD OF PATTERNING A SUBSTRATE                                                                                                       | 2011-04-19 |
| 257 | US 20110028344 A1 | BIOMARKERS FOR ENDOMETRIAL DISEASE                                                                                                     | 2011-02-03 |
| 258 | US 20110000785 A1 | ELECTRICAL PATTERNS FOR BIOSENSOR AND METHOD OF MAKING                                                                                 | 2011-01-06 |
| 259 | US 20100227133 A1 | PULSED LASER MICRO-DEPOSITION PATTERN FORMATION                                                                                        | 2010-09-09 |
| 260 | US 20100177519 A1 | ELECTRO-HYDRODYNAMIC GAS FLOW LED COOLING SYSTEM                                                                                       | 2010-07-15 |
| 261 | US 20100120145 A1 | THREE-DIMENSIONAL BIOCOMPATIBLE SKELETON STRUCTURE CONTAINING NANOPARTICLES                                                            | 2010-05-13 |
| 262 | US 20100035375 A1 | MASKLESS NANOFABRICATION OF ELECTRONIC COMPONENTS                                                                                      | 2010-02-11 |
| 263 | US 20090274740 A1 | DRUG-LOADED MEDICAL DEVICES AND METHODS FOR MANUFACTURING DRUG-LOADED MEDICAL DEVICES                                                  | 2009-11-05 |
| 264 | US 20090217517 A1 | LASER-BASED TECHNIQUE FOR THE TRANSFER AND EMBEDDING OF ELECTRONIC COMPONENTS AND DEVICES                                              | 2009-09-03 |
| 265 | US 20090130427 A1 | NANOMATERIAL FACILITATED LASER TRANSFER                                                                                                | 2009-05-21 |
| 266 | US 20090074987 A1 | LASER DECAL TRANSFER OF ELECTRONIC MATERIALS                                                                                           | 2009-03-19 |
| 267 | US 20080314881 A1 | SUB-MICRON LASER DIRECT WRITE                                                                                                          | 2008-12-25 |
| 268 | US 20080310055 A1 | REPEATABLE SHORTING AND UNSHORTING OF MICRO-ELECTRICAL CIRCUITS                                                                        | 2008-12-18 |
| 269 | US 20080252210 A1 | ELECTRODE PATTERNING                                                                                                                   | 2008-10-16 |
| 270 | US 20080139075 A1 | DEPOSITION REPAIR APPARATUS AND METHODS                                                                                                | 2008-06-12 |
| 271 | US 20070243328 A1 | P-TYPE SEMICONDUCTOR ZINC OXIDE FILMS PROCESS FOR PREPARATION THEREOF, AND PULSED LASER DEPOSITION METHOD USING TRANSPARENT SUBSTRATES | 2007-10-18 |
| 272 | US 20070180991 A1 | METHODS FOR PROVIDING THIN HYDROGEN SEPERATION MEMBRANES AND ASSOCIATED USES                                                           | 2007-08-09 |
| 273 | US 20070105395 A1 | LASER FUNCTIONALIZATION AND PATTERNING OF THICK-FILM INKS                                                                              | 2007-05-10 |
| 274 | US 20060234163 A1 | LASER-ASSISTED DEPOSITION                                                                                                              | 2006-10-19 |
| 275 | US 20060213886 A1 | MARKING METHOD AND MARKET OBJECT                                                                                                       | 2006-09-28 |
| 276 | US 20060169441 A1 | ELECTRO-HYDRODYNAMIC GAS FLOW COOLING SYSTEM                                                                                           | 2006-08-03 |
| 277 | US 20060044702 A1 | REPEATABLE ESD PROTECTION                                                                                                              | 2006-03-02 |
| 278 | US 7001467 B2     | DIRECT-WRITE LASER TRANSFER AND PROCESSING                                                                                             | 2006-02-21 |
| 279 | US 20050288813 A1 | DIRECT WRITE AND FREEFORM FABRICATION APPARATUS AND METHOD                                                                             | 2005-12-29 |
| 280 | US 20050054121 A1 | LASER TRANSFER ARTICLE AND METHOD OF MAKING                                                                                            | 2005-03-10 |
| 281 | US 6862490 B1     | DLL CIRCUIT TAKING ACCOUNT OF EXTERNAL LOAD                                                                                            | 2005-03-01 |
| 282 | US 20050026037 A1 | BIPOLAR ARTICLES AND RELATED METHODS                                                                                                   | 2005-02-03 |
| 283 | US 20050015175 A1 | DIRECT WRITE PROCESS AND APPARATUS                                                                                                     | 2005-01-20 |
| 284 | US 6792326 B1     | MATERIAL DELIVERY SYSTEM FOR MINIATURE STRUCTURE FABRICATION                                                                           | 2004-09-14 |
| 285 | US 6766764 B1     | MATRIX ASSISTED PULSED LASER EVAPORATION DIRECT WRITE                                                                                  | 2004-07-27 |
| 286 | US 20030178395 A1 | METHOD AND APPARATUS FOR FABRICATION OF MINIATURE STRUCTURES                                                                           | 2003-09-25 |
| 287 | US 20030157271 A1 | METHOD AND APPARATUS FOR PULSE-POSITION SYNCHRONIZATION IN MINIATURE STRUCTURES MANUFACTURING PROCESSES                                | 2003-08-21 |
| 288 | US 6583381 B1     | APPARATUS FOR FABRICATION OF MINIATURE STRUCTURES                                                                                      | 2003-06-24 |
| 289 | US 20030099884 A1 | BATTERY STRUCTURES, SELF-ORGANIZING STRUCTURES AND RELATED METHODS                                                                     | 2003-05-29 |
| 290 | US 20030017277 A1 | JETTING BEHAVIOR IN THE LASER FORWARD TRANSFER OF RHEOLOGICAL SYSTEMS                                                                  | 2003-01-23 |
| 291 | US 20020197401 A1 | LASER FORWARD TRANSFER OF RHEOLOGICAL SYSTEMS                                                                                          | 2002-12-26 |
| 292 | US 20020122898 A1 | GENERATION OF VIABLE CELL ACTIVE BIOMATERIAL PATTERNS BY LASER TRANSFER                                                                | 2002-09-05 |
| 293 | US 6440503 B1     | LASER DEPOSITION OF ELEMENTS ONTO MEDICAL DEVICES                                                                                      | 2002-08-27 |
| 294 | US 20020071901 A1 | GENERATION OF BIOMATERIAL MICROARRAYS BY LASER TRANSFER                                                                                | 2002-06-13 |
| 295 | US 20020029956 A1 | METHOD AND APPARATUS FOR REMOVING MINUTE PARTICLES FROM A SURFACE                                                                      | 2002-03-14 |
| 296 | US 6248658 B1     | METHOD OF FORMING SUBMICRON-DIMENSIONED METAL PATTERNS                                                                                 | 2001-06-19 |
| 297 | US 6177151 B1     | MATRIX ASSISTED PULSED LASER EVAPORATION DIRECT WRITE                                                                                  | 2001-01-23 |
| 298 | US 6159832 A      | PRECISION LASER METALLIZATION                                                                                                          | 2000-12-12 |
| 299 | US 6025110 A      | METHOD AND APPARATUS FOR GENERATING THREE-DIMENSIONAL OBJECTS USING ABLATION TRANSFER                                                  | 2000-02-15 |
| 300 | US 5492861 A      | PROCESS FOR APPLYING STRUCTURED LAYERS USING LASER TRANSFER                                                                            | 1996-02-20 |



|            |              |                                                                                               |            |
|------------|--------------|-----------------------------------------------------------------------------------------------|------------|
| <b>301</b> | US 5281575 A | LASER ABLATION METHOD FOR FORMING OXIDE SUPERCONDUCTING FILMS                                 | 1994-01-25 |
| <b>302</b> | US 4987006 A | LASER TRANSFER DEPOSITION                                                                     | 1991-01-22 |
| <b>303</b> | US 4970196 A | METHOD AND APPARATUS FOR THE THIN FILM DEPOSITION OF MATERIALS WITH A HIGH POWER PULSED LASER | 1990-11-13 |
